# Supplementary material for: The Evolutionary Origins of Recurrent Pancreatic Cancer
Source: Oxford University Press journal article supplement (doi:10.1158/2159-8290.cd-19-1508), 2020-03-19
Supplement: 21598290cd191508-sup-234363_2_supp_6154303_q71q9r.xlsx [file 21598290cd191508-sup-234363_2_supp_6154303_q71q9r.xlsx]

## Sheet: Table S1
Table S1: Clinicopathologic features of patients at initial diagnosis and at autopsy
	PAM37	PAM38	PAM39	PAM40	PAM41	PAM42	PAM43	PAM44	PAM45	PAM46
Gender	M	F	M	F	F	M	M	M	F	F
Age at Diagnosis	66	54	60	55	60	65	69	74	56	44
Smoking History	Never	Never	Ever-Current	Ever-Former	Ever-Former	Never	Ever-Former	Ever-Former	Ever-Former	Never
Pathologic Diagnosis (PT1)	Duct Adenocarcinoma	Duct Adenocarcinoma	Duct Adenocarcinoma	Duct Adenocarcinoma	Duct Adenocarcinoma with small cell features	Duct Adenocarcinoma	Duct Adenocarcinoma	Duct Adenocarcinoma	Duct Adenocarcinoma	Duct Adenocarcinoma
Surgical Procedure	Whipple	Whipple	Distal Panc	Distal Panc	Whipple	Whipple	Whipple	Whipple	Whipple	Whipple
Vascular Invasion	n.r.a	n.r.	n.r.	no	n.r.	no	n.r.	yes	n.r.	n.r.
Perineural Invasion	n.r.	n.r.	yes	n.r.	n.r.	yes	n.r.	yes	n.r.	n.r.
Lymph Nodes (Positive/Total)	9/19	6/22	n.r.	1/11	10/23	0/5	8/14	5/30	n.r.	20/32
Surgical Margin	n.r.	positive	positive	negative	negative	negative	negative	negative	n.r.	positive
Adjuvant Therapy	GM-CSF Vaccine & Gemcitabine, 5-FU-XRT, Gemcitabine	5-FU & XRT	no	no	Cisplatin/Etoposide with XRT	GM-CSF vaccine, 5-FU & XRT	Gemcitabine, 5-FU & XRT	Erlotinib and XRT followed by Gemcitabine & Erlotinib	FOLFIRINOX switched to single Gemcitabine	Gem/Oxaliplatin/XRT, followed by Gemcitabine & Oxaliplatin
Disease Free Survival (months)	21	6	11	18	6	11	8	18	7	17
Site of First Recurrence	Liver	Liver, Peritoneum, Lymph nodes	Peritoneum	Lung, Spine	Liver	Lung	Liver, Lung	Liver, Peritoneum	Pancreatic Bed	Pancreatic Bed
First Line Therapy for Recurrent Disease	Gemcitabine & Cisplatin		Gemcitabine & Taxotere	Gemcitabine & Oxaliplatin	BCL2 antagonist & Topotecan	J06-110(Gem + FTS)	Gemcitabine&Erlotinib		concurrent chemorad+Gemcitabine	FOLFIRINOX
Additional Therapies	Gemcitabine & Oxaliplatin				Topotecan alone,Paclitaxel		Erlotinib		Gemcitabine & Capecitabine,Capecitabine & Oxaliplatin,FOLFIRI,Clinical Trial of Sorafenib & pemetrexed,Clinical Trial of MEK inhibitor + multitargeted kinase inhibitor	SBRT3000cGY in 600cGY fr
Overall Survival (Months)	24	8	9	18	12	58	24	20	32	34
Gross Metastatic Burden at Autopsy	11-100	>100	11-100	11-100	>100	≤10	>100	>100	11-100	0
Pathologic Features at Autopsy (PT2 up to PT11)	Undifferentiated Carcinoma	Duct Adenocarcinoma	Duct Adenocarcinoma with Squamous Features	Duct Adenocarcinoma	Small Cell Carcinoma with Large Cell Features	Duct Adenocarcinoma	Duct Adenocarcinoma	Duct Adenocarcinoma	Duct Adenocarcinoma	Duct Adenocarcinoma with Squamous Differentiation
a n.r., not recorded

## Sheet: Table S2
Table S2: Samples used in Study
Patient	Sample ID	Tissue Fixation	Sample Type	Abbreviated Name	Treatment Status
PAM37	PAM37N	FFPE	Normal Lung	NL
PAM37	PAM37PT1	FFPE	Primary Tumor	PT1	Untreated
PAM37	PAM37PT3	FFPE	Liver Metastasis 1	LvM1	Treated
PAM37	PAM37PT4	FFPE	Liver Metastasis 2	LvM2	Treated
PAM37	PAM37PT5	FFPE	Omentum	OmM	Treated
PAM37	PAM37PT6	FFPE	Liver Metastasis 3	LvM3	Treated
PAM38	PAM38N	FFPE	Normal Kidney	N
PAM38	PAM38PT1	FFPE	Primary Tumor	PT1	Untreated
PAM38	PAM38PT2	FFPE	Local Recurrence	LR	Treated
PAM38	PAM38PT3	FFPE	Lung Metastasis	LgM	Treated
PAM38	PAM38PT4	FFPE	Liver Metastasis	LvM	Treated
PAM39	PAM39N	Frozen	Normal Kidney	N
PAM39	PAM39PT1	FFPE	Primary Tumor	PT1	Untreated
PAM39	PAM39PT2	Frozen	Local Recurrence 1	LR1	Treated
PAM39	PAM39PT3	Frozen	Local Recurrence 2	LR2	Treated
PAM39	PAM39PT4	Frozen	Lymph Node Metastasis 1	LNM1	Treated
PAM39	PAM39PT5	Frozen	Lymph Node Metastasis 2	LNM2	Treated
PAM39	PAM39PT6	Frozen	Liver Metastasis	LvM	Treated
PAM39	PAM39PT7	Frozen	Diaphragm Metastasis	DiaM	Treated
PAM39	PAM39PT8	Frozen	Small Bowel Metastasis	SBM	Treated
PAM39	PAM39PT9	Frozen	Prostate Metastasis	ProstM	Treated
PAM40	PAM40N	Frozen	Normal Kidney	N
PAM40	PAM40PT1	FFPE	Primary Tumor	PT1	Untreated
PAM40	PAM40PT2	Frozen	Local Recurrence 1	LR1	Treated
PAM40	PAM40PT3	Frozen	Local Recurrence 2	LR2	Treated
PAM40	PAM40PT4	Frozen	Liver Metastasis 1	LvM1	Treated
PAM40	PAM40PT5	Frozen	Liver Metastasis 2	LvM2	Treated
PAM40	PAM40PT6	Frozen	Liver Metastasis 3	LvM3	Treated
PAM40	PAM40PT7	Frozen	Liver Metastasis 4	LvM4	Treated
PAM40	PAM40PT8	Frozen	Liver Metastasis 5	LvM5	Treated
PAM41	PAM41N	Frozen	Normal Heart	N
PAM41	PAM41PT1	FFPE	Primary Tumor	PT1	Untreated
PAM41	PAM41PT2	Frozen	Local Recurrence	LR	Treated
PAM41	PAM41PT3	Frozen	Liver Metastasis 1	LvM1	Treated
PAM41	PAM41PT4	Frozen	Liver Metastasis 2	LvM2	Treated
PAM41	PAM41PT5	Frozen	Lung Metastasis 1	LgM1	Treated
PAM41	PAM41PT6	Frozen	Lung Metastasis 2	LgM2	Treated
PAM41	PAM41PT7	Frozen	Peritoneum Metastasis	PeM	Treated
PAM41	PAM41PT8	Frozen	Liver Metastasis 3	LvM3	Treated
PAM41	PAM41PT9	Frozen	Liver Metastasis 4	LvM4	Treated
PAM41	PAM41PT10	Frozen	Liver Metastasis 5	LvM5	Treated
PAM41	PAM41PT11	Frozen	Liver Metastasis 6	LvM6	Treated
PAM42	PAM42N	FFPE	Normal Kidney	N
PAM42	PAM42PT1	FFPE	Primary Tumor	PT1	Untreated
PAM42	PAM42PT2	FFPE	Local Recurrence 1	LR1	Treated
PAM42	PAM42PT3	FFPE	Local Recurrence 2	LR2	Treated
PAM42	PAM42PT4	FFPE	Lung Metastasis 1	LgM1	Treated
PAM42	PAM42PT5	FFPE	Lung Metastasis 2	LgM2	Treated
PAM42	PAM42PT6	FFPE	Pericardial Metastasis	PcardM	Treated
PAM43	PAM43N	Frozen	Normal Spleen	N
PAM43	PAM43PT1	FFPE	Primary Tumor	PT1	Untreated
PAM43	PAM43PT2	FFPE	Local Recurrence	LR	Treated
PAM43	PAM43PT3	FFPE	Liver Metastasis	LvM	Treated
PAM43	PAM43PT4	FFPE	Aortic Metastasis	AoM	Treated
PAM43	PAM43PT5	FFPE	Mesenteric Metastasis	MeM	Treated
PAM43	PAM43PT6	FFPE	Lung Metastasis	LgM	Treated
PAM44	PAM44N	Frozen	Normal Heart	N
PAM44	PAM44PT1	FFPE	Primary Tumor	PT1	Untreated
PAM44	PAM44PT2	Frozen	Local Recurrence 1	LR1	Treated
PAM44	PAM44PT3	Frozen	Local Recurrence 2	LR2	Treated
PAM44	PAM44PT4	Frozen	Liver Metastasis 1	LvM1	Treated
PAM44	PAM44PT5	Frozen	Liver Metastasis 2	LvM2	Treated
PAM45	PAM45N	Frozen	Normal Spleen	N
PAM45	PAM45PT1	FFPE	Primary Tumor	PT1	Untreated
PAM45	PAM45PT2	Frozen	Local Recurrence	LR	Treated
PAM45	PAM45PT3	Frozen	Abdominal Wall Metastasis 1	AbM1	Treated
PAM45	PAM45PT4	Frozen	Abdominal Wall Metastasis 2	AbM2	Treated
PAM45	PAM45PT5	Frozen	Paraaortic Lymph Node 1	PaLNM1	Treated
PAM45	PAM45PT6	Frozen	Paraaortic Lymph Node 2	PaLNM2	Treated
PAM45	PAM45PT7	Frozen	Diaphragm Metastasis	DiaM	Treated
PAM45	PAM45PT8	Frozen	Perirectal Metastasis	PrectM	Treated
PAM46	PAM46N	Frozen	Normal Spleen	N
PAM46	PAM46PT1	FFPE	Primary Tumor	PT1	Untreated
PAM46	PAM46PT2	Frozen	Local Recurrence 1	LR1	Treated
PAM46	PAM46PT3	Frozen	Local Recurrence 2	LR2	Treated
PAM46	PAM46PT4	Frozen	Local Recurrence 3	LR3	Treated
PAM46	PAM46PT5	Frozen	Local Recurrence 4	LR4	Treated
PAM46	PAM46PT6	Frozen	Local Recurrence 5	LR5	Treated
PAM46	PAM46PT7	Frozen	Local Recurrence 6	LR6	Treated
PAM46	PAM46PT8	Frozen	Local Recurrence 7	LR7	Treated
PAM46	PAM46PT9	Frozen	Local Recurrence 8	LR8	Treated

## Sheet: Table S3
Table S3: Sequencing Quality Metrics for Whole Exome Sequencing
Sample ID	Tissue Fixation	Sample Type	BAIT_SET	GENOME_SIZE	BAIT_TERRITORY	TARGET_TERRITORY	BAIT_DESIGN_EFFICIENCY	TOTAL_READS	PF_READS	PF_UNIQUE_READS	PCT_PF_READS	PCT_PF_UQ_READS	PF_UQ_READS_ALIGNED	PCT_PF_UQ_READS_ALIGNED	PF_UQ_BASES_ALIGNED	ON_BAIT_BASES	NEAR_BAIT_BASES	OFF_BAIT_BASES	ON_TARGET_BASES	PCT_SELECTED_BASES	PCT_OFF_BAIT	ON_BAIT_VS_SELECTED	MEAN_BAIT_COVERAGE	MEAN_TARGET_COVERAGE	PCT_USABLE_BASES_ON_BAIT	PCT_USABLE_BASES_ON_TARGET	FOLD_ENRICHMENT	ZERO_CVG_TARGETS_PCT	FOLD_80_BASE_PENALTY	PCT_TARGET_BASES_2X	PCT_TARGET_BASES_10X	PCT_TARGET_BASES_20X	PCT_TARGET_BASES_30X	PCT_TARGET_BASES_40X	PCT_TARGET_BASES_50X	PCT_TARGET_BASES_100X	HS_LIBRARY_SIZE	HS_PENALTY_10X	HS_PENALTY_20X	HS_PENALTY_30X	HS_PENALTY_40X	HS_PENALTY_50X	HS_PENALTY_100X	AT_DROPOUT	GC_DROPOUT	Median MAF (Mean)	Estimated Purity
PAM37N	FFPE	Normal Lung	AgilentExon_51MB_hg19_v3	3137282684	51133330	32931921	0.64404	107501834	107501834	107501834	1	1	104473524	0.97183	10085057133	7456678646	1218430861	1409947626	4924648233	0.860194	0.139806	0.859549	145.828	149.625	0.707788	0.467448	45.3646	0.000568	2.67188	0.992217	0.976509	0.950982	0.917607	0.877617	0.832142	0.586113		0	0	0	0	0	0	16.751	0.746165
PAM37PT1	FFPE	Primary Tumor	AgilentExon_51MB_hg19_v3	3137282684	51133330	32931921	0.64404	316553042	316553042	316553042	1	1	311047072	0.982606	29758703508	23367052508	3003834274	3387816726	14993693126	0.886157	0.113843	0.886093	456.983	455.515	0.767679	0.492589	48.177	0.000452	2.12858	0.994449	0.98846	0.98236	0.976033	0.969146	0.961624	0.918262		0	0	0	0	0	0	1.73478	1.28768	8.4% (10.1%)	0.242
PAM37PT2	FFPE	Local Recurrence	AgilentExon_51MB_hg19_v3	3137282684	51133330	32931921	0.64404	318589498	318589498	318589498	1	1	308703617	0.96897	28580684811	23837927122	2594959206	2147798483	15022572508	0.924851	0.075149	0.901828	466.192	456.382	0.796074	0.501683	51.1735	0.00042	2.59308	0.992867	0.984999	0.975488	0.965592	0.955295	0.944902	0.891183		0	0	0	0	0	0	0.249013	7.93065	7.8% (9.0%)	0.234
PAM37PT3	FFPE	Liver Metastasis 1	AgilentExon_51MB_hg19_v3	3137282684	51133330	32931921	0.64404	362414710	362414710	362414710	1	1	356624978	0.984025	32690576346	27621663500	2833488388	2235424458	17399300024	0.931619	0.068381	0.906962	540.189	528.59	0.817084	0.514694	51.8414	0.000441	2.55358	0.993165	0.986368	0.978343	0.969756	0.960942	0.95206	0.907051		0	0	0	0	0	0	0.738874	5.68415	1.9% (2.9%)	0.116
PAM37PT4	FFPE	Liver Metastasis 2	AgilentExon_51MB_hg19_v3	3137282684	51133330	32931921	0.64404	188524138	188524138	188524138	1	1	183013694	0.970771	17505568219	12392884656	2141436288	2971247275	8118148899	0.830268	0.169732	0.852663	242.364	246.647	0.675379	0.442417	43.4356	0.000499	2.49139	0.993973	0.985497	0.974469	0.96021	0.943216	0.923899	0.797527		0	0	0	0	0	0	13.2711	0.819504	9.1% (10.5%)	0.211
PAM37PT5	FFPE	Omentum	AgilentExon_51MB_hg19_v3	3137282684	51133330	32931921	0.64404	299617858	299617858	299617858	1	1	295933189	0.987702	26770102009	22904304160	2214220844	1651577005	14497312494	0.938305	0.061695	0.911849	447.933	440.459	0.838071	0.530458	52.4948	0.000494	2.54601	0.992933	0.984733	0.974547	0.963956	0.953083	0.942236	0.887448		0	0	0	0	0	0	1.00658	3.01842	1.9% (4.9%)	0.245
PAM37PT6	FFPE	Liver Metastasis 3	AgilentExon_51MB_hg19_v3	3137282684	51133330	32931921	0.64404	373677478	373677478	373677478	1	1	368694778	0.986666	34037623261	28854021415	2986883762	2196718084	18250215359	0.935462	0.064538	0.906194	564.29	554.465	0.828156	0.52381	52.0112	0.000484	2.43187	0.993414	0.987226	0.980167	0.972714	0.964876	0.95684	0.916191		0	0	0	0	0	0	0.713697	3.93925	6.2% (7.6%)	0.19
PAM38N	FFPE	Normal Kidney	AgilentExon_51MB_hg19_v3	3137282684	51133330	32931921	0.64404	101602684	101602684	101602684	1	1	99484069	0.979148	8829865552	7381856690	629723813	818285049	4753860268	0.907328	0.092672	0.921398	144.365	144.574	0.806282	0.519239	51.2934	0.001671	2.45041	0.985943	0.958598	0.926036	0.894675	0.863208	0.83108	0.641948		0	0	0	0	0	0	1.98714	3.40303
PAM38PT1	FFPE	Primary Tumor	AgilentExon_51MB_hg19_v3	3137282684	51133330	32931921	0.64404	231451620	231451620	231451620	1	1	226549640	0.978821	21979087595	15707469605	2909701622	3361916368	10179010856	0.84704	0.15296	0.843709	307.187	309.546	0.69567	0.45082	43.8476	0.001477	1.94683	0.994025	0.988069	0.981411	0.974428	0.966225	0.956593	0.8936		0	0	0	0	0	0	3.02404	1.6527	5.7% (8.9%)	0.114
PAM38PT2	FFPE	Local Recurrence	AgilentExon_51MB_hg19_v3	3137282684	51133330	32931921	0.64404	328183064	328183064	328183064	1	1	323431665	0.985522	28354878946	24633878588	1883105674	1837894684	15910890537	0.935182	0.064818	0.928985	481.758	483.482	0.843749	0.544973	53.3034	0.000799	2.49218	0.991247	0.982108	0.972068	0.961961	0.951935	0.942078	0.893546		0	0	0	0	0	0	6.58518	1.25767	9.4% (10.7%)	0.236
PAM38PT3	FFPE	Lung Metastasis	AgilentExon_51MB_hg19_v3	3137282684	51133330	32931921	0.64404	146928744	146928744	146928744	1	1	138902957	0.945376	12504344915	6911772501	736801098	4855771316	4427880900	0.611673	0.388327	0.903668	135.172	134.671	0.513652	0.329061	33.9139	0.00184	2.49391	0.986693	0.955622	0.920039	0.885371	0.850302	0.814114	0.606697		0	0	0	0	0	0	0.81726	7.93365	9.2% (10.8%)	0.228
PAM38PT4	FFPE	Liver Metastasis	AgilentExon_51MB_hg19_v3	3137282684	51133330	32931921	0.64404	217771008	217771008	217771008	1	1	213529255	0.980522	17783866432	15430632229	982004019	1371230184	10172618203	0.922895	0.077105	0.940168	301.772	309.252	0.835733	0.550956	53.2362	0.001288	2.86345	0.98716	0.970036	0.95132	0.93339	0.916211	0.899404	0.814966		0	0	0	0	0	0	11.3682	1.03186	8.3% (10.7%)	0.288
PAM39N	Frozen	Normal Kidney	AgilentExon_51MB_hg19_v3	3137282684	51133330	32931921	0.64404	98821818	98821818	98821818	1	1	95912144	0.970556	9389527448	6412430622	1422611673	1554485153	4250756372	0.834445	0.165555	0.81843	125.406	129.155	0.657712	0.435993	41.9014	0.000673	2.26587	0.993449	0.980743	0.958788	0.927119	0.887006	0.839492	0.553563		0	0	0	0	0	0	12.8647	1.0938
PAM39PT1	FFPE	Primary Tumor	AgilentExon_51MB_hg19_v3	3137282684	51133330	32931921	0.64404	210370778	210370778	210370778	1	1	203163139	0.965738	19263555161	12328996012	1890391986	5044167163	7940085631	0.73815	0.26185	0.867055	241.115	241.246	0.615038	0.396095	39.2682	0.000578	2.11619	0.994022	0.983644	0.970767	0.956446	0.9407	0.923911	0.829722		0	0	0	0	0	0	0.815134	4.93564	19.5% (18.9%)	0.412
PAM39PT2	Frozen	Local Recurrence 1	AgilentExon_51MB_hg19_v3	3137282684	51133330	32931921	0.64404	270834088	270834088	270834088	1	1	264675101	0.977259	25958831906	16760115895	4252102843	4946613168	10940979691	0.809444	0.190556	0.797637	327.773	332.417	0.629885	0.411188	39.6133	0.000568	1.92148	0.99543	0.990052	0.98451	0.978964	0.972864	0.965839	0.914413		0	0	0	0	0	0	3.76104	1.70375	15.0% (16.7%)	0.393
PAM39PT3	Frozen	Local Recurrence 2	AgilentExon_51MB_hg19_v3	3137282684	51133330	32931921	0.64404	238306706	238306706	238306706	1	1	233514608	0.979891	22937133011	16461353426	3987214233	2488565352	10861992886	0.891505	0.108495	0.805013	321.93	330.009	0.701404	0.46282	44.0328	0.00052	2.08867	0.995559	0.991417	0.986708	0.981524	0.975096	0.967159	0.907115		0	0	0	0	0	0	10.3386	0.911941	16.4% (16.6%)	0.356
PAM39PT4	Frozen	Lymph Node Metastasis 1	AgilentExon_51MB_hg19_v3	3137282684	51133330	32931921	0.64404	220947184	220947184	220947184	1	1	216280214	0.978877	21258662359	14230676909	3492260234	3535725216	9367218723	0.833681	0.166319	0.802953	278.305	284.598	0.654008	0.430495	41.0714	0.000531	2.1725	0.995421	0.990194	0.984113	0.976821	0.96762	0.95653	0.872805		0	0	0	0	0	0	11.6814	0.985916	7.7% (9.1%)	0.172
PAM39PT5	Frozen	Lymph Node Metastasis 2	AgilentExon_51MB_hg19_v3	3137282684	51133330	32931921	0.64404	319750034	319750034	319750034	1	1	310660600	0.971573	30423545140	18770850960	4545607155	7107087025	12422833545	0.766395	0.233605	0.805047	367.096	377.415	0.597828	0.395651	37.855	0.000478	2.30131	0.996126	0.992054	0.987455	0.982338	0.976159	0.968681	0.913251		0	0	0	0	0	0	14.2988	0.927312	20.2% (23.8%)	0.461
PAM39PT6	Frozen	Liver Metastasis	AgilentExon_51MB_hg19_v3	3137282684	51133330	32931921	0.64404	232426690	232426690	232426690	1	1	228128867	0.981509	22454467920	15547609878	3920842470	2986015572	10199561690	0.867019	0.132981	0.798605	304.06	309.883	0.678495	0.445107	42.4825	0.000526	1.99924	0.995437	0.990537	0.985105	0.979155	0.971927	0.963339	0.900673		0	0	0	0	0	0	4.77426	1.35478	28.1% (26.6%)	0.629
PAM39PT7	Frozen	Diaphragm Metastasis	AgilentExon_51MB_hg19_v3	3137282684	51133330	32931921	0.64404	288798232	288798232	288798232	1	1	282447915	0.978011	27816666618	17684929803	5235011914	4896724901	11612049743	0.823964	0.176036	0.771596	345.859	352.794	0.62077	0.407602	39.0075	0.000526	1.90699	0.995787	0.991542	0.986817	0.982265	0.97725	0.971314	0.927242		0	0	0	0	0	0	3.87755	1.66195	17.6% (20.5%)	0.394
PAM39PT8	Frozen	Small Bowel Metastasis	AgilentExon_51MB_hg19_v3	3137282684	51133330	32931921	0.64404	294174492	294174492	294174492	1	1	286764633	0.974811	28113305059	17234038602	4514970855	6364295602	11227982522	0.77362	0.22638	0.792406	337.041	341.122	0.596488	0.388612	37.6119	0.000515	1.91642	0.995835	0.991106	0.985892	0.980582	0.974821	0.968107	0.918144		0	0	0	0	0	0	1.78879	2.06269	15.1% (17.1%)	0.36
PAM39PT9	Frozen	Prostate Metastasis	AgilentExon_51MB_hg19_v3	3137282684	51133330	32931921	0.64404	228011654	228011654	228011654	1	1	222741581	0.976887	21807443965	15014794688	3422584348	3370064929	9936199366	0.845463	0.154537	0.814367	293.64	301.876	0.670561	0.443751	42.2439	0.000515	2.21968	0.995566	0.990498	0.98486	0.978096	0.969439	0.958775	0.880448		0	0	0	0	0	0	12.6212	1.12331	21.2% (23.1%)	0.491
PAM40N	Frozen	Normal Kidney	AgilentExon_51MB_hg19_v3	3137282684	51133330	32931921	0.64404	95511624	95511624	95511624	1	1	92769961	0.971295	9080805984	6537159972	1346127206	1197518806	4377818939	0.868126	0.131874	0.829243	127.845	133.122	0.692416	0.463698	44.1687	0.001451	2.66244	0.992084	0.97846	0.951551	0.912244	0.861814	0.801679	0.475676		0	0	0	0	0	0	19.5243	2.88704
PAM40PT1	FFPE	Primary Tumor	AgilentExon_51MB_hg19_v3	3137282684	51133330	32931921	0.64404	240253512	240253512	240253512	1	1	229193311	0.953964	21930893635	14277424609	2413230524	5240238502	9252543706	0.761057	0.238943	0.855414	279.22	281.356	0.613463	0.397557	39.9432	0.001382	2.23298	0.994192	0.9871	0.979085	0.969265	0.957116	0.94326	0.855999		0	0	0	0	0	0	11.7487	0.924679	3.2% (6.7%)	0.274
PAM40PT2	Frozen	Local Recurrence 1	AgilentExon_51MB_hg19_v3	3137282684	51133330	32931921	0.64404	272629576	272629576	272629576	1	1	264836554	0.971415	25915809060	16710462817	3918408786	5286937457	10832757539	0.795996	0.204004	0.810052	326.802	329.439	0.625207	0.405298	39.5615	0.00143	1.91534	0.994771	0.989829	0.984475	0.97896	0.972736	0.965429	0.911762		0	0	0	0	0	0	3.8881	1.45693	15.0% (15.5%)	0.316
PAM40PT3	Frozen	Local Recurrence 2	AgilentExon_51MB_hg19_v3	3137282684	51133330	32931921	0.64404	188965460	188965460	188965460	1	1	183900808	0.973198	18075292450	11589329733	2825799871	3660162846	7557050186	0.797505	0.202495	0.80397	226.649	229.819	0.622923	0.406189	39.3389	0.001472	1.94762	0.994048	0.987906	0.980192	0.971115	0.959665	0.945435	0.845997		0	0	0	0	0	0	3.11856	1.47725	23.2% (23.2%)	0.472
PAM40PT4	Frozen	Liver Metastasis 1	AgilentExon_51MB_hg19_v3	3137282684	51133330	32931921	0.64404	250490500	250490500	250490500	1	1	243334443	0.971432	23852675946	16442994938	3823872189	3585808819	11003379459	0.849668	0.150332	0.811324	321.571	334.582	0.666923	0.446294	42.2954	0.001367	2.35621	0.994608	0.989976	0.984594	0.978409	0.970487	0.960806	0.888407		0	0	0	0	0	0	13.7174	1.39332	28.6% (26.9%)	0.603
PAM40PT5	Frozen	Liver Metastasis 2	AgilentExon_51MB_hg19_v3	3137282684	51133330	32931921	0.64404	295848670	295848670	295848670	1	1	288217130	0.974205	28272992982	18948360746	4449441572	4875190664	12527957916	0.827567	0.172433	0.809835	370.568	380.963	0.651473	0.43073	41.1197	0.001414	2.14024	0.994854	0.990445	0.985844	0.981164	0.975784	0.969316	0.921955		0	0	0	0	0	0	11.9615	0.93173	11.1% (11.7%)	0.228
PAM40PT6	Frozen	Liver Metastasis 3	AgilentExon_51MB_hg19_v3	3137282684	51133330	32931921	0.64404	210396586	210396586	210396586	1	1	204871460	0.973739	20067728578	13810001062	3254911000	3002816516	9205846150	0.850366	0.149634	0.809263	270.078	279.971	0.667199	0.44476	42.2226	0.001456	2.20449	0.994526	0.989295	0.983268	0.975974	0.966461	0.954684	0.865759		0	0	0	0	0	0	12.384	1.48407	13.9% (14.7%)	0.299
PAM40PT7	Frozen	Liver Metastasis 4	AgilentExon_51MB_hg19_v3	3137282684	51133330	32931921	0.64404	365101972	365101972	365101972	1	1	359211969	0.983868	35395231825	25798832753	5458728113	4137670959	17127428959	0.883101	0.116899	0.825363	504.54	520.844	0.71494	0.474637	44.7203	0.001403	2.12589	0.994883	0.991133	0.987186	0.983249	0.978903	0.974027	0.943913		0	0	0	0	0	0	8.81679	1.17199	20.5% (19.7%)	0.439
PAM40PT8	Frozen	Liver Metastasis 5	AgilentExon_51MB_hg19_v3	3137282684	51133330	32931921	0.64404	276127440	276127440	276127440	1	1	268942166	0.973978	26307575450	18974612809	4054493587	3278469054	12792070826	0.875379	0.124621	0.82394	371.081	389.02	0.69871	0.471048	44.2529	0.001409	3.35362	0.994624	0.98954	0.982745	0.973653	0.962141	0.948181	0.841862		0	0	0	0	0	0	24.7979	2.48242	21.4% (21.6%)	0.458
PAM41N	Frozen	Normal Heart	AgilentExon_51MB_hg19_v3	3137282684	51133330	32931921	0.64404	89530010	89530010	89530010	1	1	86805023	0.969563	8570612825	5010581321	1576223010	1983808494	3307216818	0.768534	0.231466	0.7607	97.9905	100.589	0.564531	0.372617	35.8695	0.001771	1.8979	0.991913	0.978972	0.957764	0.9248	0.879001	0.821459	0.458414		0	0	0	0	0	0	5.3313	1.36967
PAM41PT1	FFPE	Primary Tumor	AgilentExon_51MB_hg19_v3	3137282684	51133330	32931921	0.64404	213847760	213847760	213847760	1	1	209015628	0.977404	19809951411	14967550926	1924734499	2917665986	9585368307	0.852717	0.147283	0.886058	292.716	291.502	0.730385	0.467746	46.3572	0.001472	2.20835	0.992976	0.984829	0.975273	0.964104	0.951366	0.937464	0.859413		0	0	0	0	0	0	8.758	0.960503	5.5% (7.7%)	0.125
PAM41PT2	Frozen	Local Recurrence	AgilentExon_51MB_hg19_v3	3137282684	51133330	32931921	0.64404	192046534	192046534	192046534	1	1	188450387	0.981275	18549548401	12134402999	3054882527	3360262875	7943308496	0.818849	0.181151	0.798879	237.309	241.577	0.640973	0.419588	40.1361	0.001524	2.19616	0.994184	0.98785	0.979601	0.969208	0.955953	0.939888	0.827301		0	0	0	0	0	0	5.06182	1.24509	11.7% (15.9%)	0.296
PAM41PT3	Frozen	Liver Metastasis 1	AgilentExon_51MB_hg19_v3	3137282684	51133330	32931921	0.64404	270965202	270965202	270965202	1	1	264521742	0.97622	26043125128	16765712922	3955721577	5321690629	11197137977	0.795659	0.204341	0.8091	327.882	340.554	0.627275	0.418932	39.4983	0.001477	4.10306	0.994266	0.985387	0.968889	0.947008	0.920064	0.890792	0.762851		0	0	0	0	0	0	20.1864	0.721038	13.3% (17.6%)	0.345
PAM41PT4	Frozen	Liver Metastasis 2	AgilentExon_51MB_hg19_v3	3137282684	51133330	32931921	0.64404	216161254	216161254	216161254	1	1	206297553	0.954369	19896937694	13499516119	2467491926	3929929649	9259155445	0.802486	0.197514	0.845463	264.006	281.62	0.642479	0.440669	41.6276	0.001561	3.47679	0.993974	0.985281	0.970605	0.950892	0.92678	0.89918	0.732736		0	0	0	0	0	0	23.3522	4.2446	11.1% (16.8%)	0.499
PAM41PT5	Frozen	Lung Metastasis 1	AgilentExon_51MB_hg19_v3	3137282684	51133330	32931921	0.64404	324407364	324407364	324407364	1	1	317298229	0.978086	31378183394	19857391495	5805969659	5714822240	13136911046	0.817873	0.182127	0.773764	388.345	399.516	0.617096	0.408248	38.8279	0.001456	2.09171	0.995176	0.991973	0.988041	0.983898	0.979111	0.97368	0.932258		0	0	0	0	0	0	7.0598	1.15444	15.0% (18.3%)	0.457
PAM41PT6	Frozen	Lung Metastasis 2	AgilentExon_51MB_hg19_v3	3137282684	51133330	32931921	0.64404	272239604	272239604	272239604	1	1	266957506	0.980598	26244141175	18303577996	4225457988	3715105191	11945626374	0.858441	0.141559	0.812444	357.958	363.267	0.682652	0.445526	42.7911	0.001409	2.04083	0.994715	0.990666	0.986002	0.981014	0.975216	0.968296	0.918073		0	0	0	0	0	0	5.11091	1.16708	26.6% (27.5%)	0.594
PAM41PT7	Frozen	Peritoneum Metastasis	AgilentExon_51MB_hg19_v3	3137282684	51133330	32931921	0.64404	380017262	380017262	380017262	1	1	372967660	0.981449	36709015805	27077880030	5749836603	3881299172	18149205653	0.894269	0.105731	0.824848	529.554	551.945	0.722459	0.484235	45.2576	0.001419	2.9997	0.994886	0.991311	0.987112	0.982179	0.976278	0.969398	0.921274		0	0	0	0	0	0	18.9625	0.689232	12.9% (15.1%)	0.32
PAM41PT8	Frozen	Liver Metastasis 1	AgilentExon_51MB_hg19_v3	3137282684	51133330	32931921	0.64404	241876158	241876158	241876158	1	1	238143444	0.984568	23181973827	17095144907	3419411605	2667417315	11298136653	0.884936	0.115064	0.833318	334.325	343.594	0.724762	0.478993	45.2451	0.001456	2.27546	0.994251	0.989185	0.983413	0.976801	0.968658	0.959138	0.893051		0	0	0	0	0	0	10.6425	0.840522	18.1% (18.4%)	0.392
PAM41PT9	Frozen	Liver Metastasis 2	AgilentExon_51MB_hg19_v3	3137282684	51133330	32931921	0.64404	288902638	288902638	288902638	1	1	283241412	0.980404	27781164939	19155732961	4467089609	4158342369	12579118016	0.850318	0.149682	0.810899	374.623	382.571	0.674764	0.443102	42.3056	0.001461	2.13727	0.994704	0.990469	0.985756	0.980915	0.975188	0.968458	0.920076		0	0	0	0	0	0	8.08652	1.03297	12.5% (17.3%)	0.458
PAM41PT10	Frozen	Liver Metastasis 3	AgilentExon_51MB_hg19_v3	3137282684	51133330	32931921	0.64404	207374856	207374856	207374856	1	1	203433158	0.980992	19987521205	14671543314	2894568773	2421409118	9784568341	0.878854	0.121146	0.835219	286.927	297.565	0.718546	0.479204	45.0367	0.001461	2.80722	0.993902	0.987094	0.976997	0.964447	0.949735	0.9326	0.816661		0	0	0	0	0	0	15.0945	0.749734	15.8% (19.2%)	0.425
PAM41PT11	Frozen	Liver Metastasis 4	AgilentExon_51MB_hg19_v3	3137282684	51133330	32931921	0.64404	212614244	212614244	212614244	1	1	208207229	0.979272	20445394669	14447029596	3008988808	2989376265	9671998544	0.853787	0.146213	0.827625	282.536	294.158	0.69046	0.462249	43.3543	0.001487	3.0964	0.994019	0.987221	0.977098	0.963724	0.946957	0.926685	0.786301		0	0	0	0	0	0	19.7784	0.608989	10.8% (14.8%)	0.27
PAM42N	FFPE	Normal Kidney	AgilentExon_51MB_hg19_v3	3137282684	51133330	32931921	0.64404	86957782	86957782	86957782	1	1	83890601	0.964728	7910664627	5727778780	697338748	1485547099	3676619293	0.81221	0.18779	0.891467	112.017	111.739	0.690976	0.443532	44.4245	0.000883	2.19096	0.988488	0.963163	0.928156	0.889829	0.849118	0.805098	0.530011		0	0	0	0	0	0	2.7286	2.14422
PAM42PT1	FFPE	Primary Tumor	AgilentExon_51MB_hg19_v3	3137282684	51133330	32931921	0.64404	215485310	215485310	215485310	1	1	210747389	0.978013	20373697636	14228591236	2318242661	3826863739	9131361518	0.812166	0.187834	0.859898	278.265	277.473	0.680599	0.436782	42.8491	0.000604	2.08626	0.99401	0.985557	0.975754	0.965059	0.952934	0.939583	0.861109		0	0	0	0	0	0	0.678452	4.99869	7.3% (9.8%)	0.164
PAM42PT2	FFPE	Local Recurrence 1	AgilentExon_51MB_hg19_v3	3137282684	51133330	32931921	0.64404	250460416	250460416	250460416	1	1	243968876	0.974082	23746664629	16241744097	2757873726	4747046806	10392580636	0.800096	0.199904	0.854846	317.635	315.782	0.663908	0.424814	41.9643	0.000578	2.01135	0.994641	0.987409	0.979593	0.971324	0.961999	0.95158	0.888082		0	0	0	0	0	0	1.36779	2.11484	11.4% (13.7%)	0.257
PAM42PT3	FFPE	Local Recurrence 2	AgilentExon_51MB_hg19_v3	3137282684	51133330	32931921	0.64404	187160730	187160730	187160730	1	1	181794255	0.971327	17542421436	12042782358	1935476419	3564162659	7698894551	0.796826	0.203174	0.861537	235.517	233.934	0.663931	0.424448	42.1199	0.000583	2.05206	0.993953	0.984518	0.972923	0.959502	0.944304	0.927545	0.830979		0	0	0	0	0	0	1.14322	2.7723	12.0% (13.7%)	0.271
PAM42PT4	FFPE	Lung Metastasis 1	AgilentExon_51MB_hg19_v3	3137282684	51133330	32931921	0.64404	221024256	221024256	221024256	1	1	215418806	0.974639	20609174605	14407721257	1982362922	4219090426	9222497152	0.795281	0.204719	0.879051	281.768	280.243	0.678141	0.434084	42.8928	0.000589	2.20663	0.993778	0.983964	0.972238	0.959503	0.945701	0.931077	0.849728		0	0	0	0	0	0	0.595729	5.46457	14.9% (16.8%)	0.359
PAM42PT5	FFPE	Lung Metastasis 2	AgilentExon_51MB_hg19_v3	3137282684	51133330	32931921	0.64404	266975356	266975356	266975356	1	1	258363859	0.967744	24529994425	17080265689	2221930598	5227798138	10892029205	0.786881	0.213119	0.884887	334.034	330.942	0.669463	0.426915	42.7215	0.00051	2.23609	0.994368	0.98544	0.975204	0.964211	0.952534	0.940229	0.872855		0	0	0	0	0	0	0.96477	4.46154	12.1% (14.3%)	0.312
PAM42PT6	FFPE	Pericardial Metastasis	AgilentExon_51MB_hg19_v3	3137282684	51133330	32931921	0.64404	348951400	348951400	348951400	1	1	343300580	0.983806	32652493439	26892760094	3516980150	2242753195	17042249611	0.931314	0.068686	0.884347	525.934	517.794	0.800333	0.50718	50.5322	0.000547	2.36436	0.993471	0.986682	0.979024	0.971326	0.963436	0.955387	0.913027		0	0	0	0	0	0	0.406096	9.67775	6.4% (8.1%)	0.148
PAM43N	Frozen	Normal Spleen	AgilentExon_51MB_hg19_v3	3137282684	51133330	32931921	0.64404	119460850	119460850	119460850	1	1	117335766	0.982211	11492220251	8311048474	1692948838	1488222939	5414920930	0.870502	0.129498	0.830773	162.537	164.558	0.707587	0.461016	44.3712	0.000673	1.95902	0.99297	0.982484	0.968907	0.951235	0.929294	0.904061	0.740999		0	0	0	0	0	0	2.23282	1.82733
PAM43PT1	FFPE	Primary Tumor	AgilentExon_51MB_hg19_v3	3137282684	51133330	32931921	0.64404	243792782	243792782	243792782	1	1	236993525	0.972111	22840550271	14174172035	2353891131	6312487105	9198760512	0.723628	0.276372	0.857582	277.2	279.509	0.601122	0.390116	38.0751	0.000526	2.11749	0.995053	0.987536	0.979091	0.969141	0.957504	0.944318	0.862994		0	0	0	0	0	0	5.60553	1.33358	15.3% (16.0%)	0.34
PAM43PT2	FFPE	Local Recurrence	AgilentExon_51MB_hg19_v3	3137282684	51133330	32931921	0.64404	169956938	169956938	169956938	1	1	163869068	0.96418	15359579312	8879518603	1199758865	5280301844	5715412764	0.656221	0.343779	0.880968	173.654	173.699	0.545988	0.351432	35.4699	0.00082	2.28552	0.991836	0.97492	0.953081	0.92873	0.903032	0.87604	0.72375		0	0	0	0	0	0	1.55167	3.15997	13.6% (15.8%)	0.297
PAM43PT3	FFPE	Liver Metastasis	AgilentExon_51MB_hg19_v3	3137282684	51133330	32931921	0.64404	257652924	257652924	257652924	1	1	251656242	0.976726	24421546597	17165460546	2600680596	4655405455	11120931466	0.809373	0.190627	0.868428	335.7	337.916	0.682093	0.441905	43.1253	0.000531	2.15233	0.994385	0.986537	0.97829	0.96947	0.959637	0.948943	0.88601		0	0	0	0	0	0	1.08426	2.80636	21.5% (24.6%)	0.449
PAM43PT4	FFPE	Aortic Metastasis	AgilentExon_51MB_hg19_v3	3137282684	51133330	32931921	0.64404	259879530	259879530	259879530	1	1	254912506	0.980887	24516883660	18660958926	2662962207	3192962527	12070495702	0.869765	0.130235	0.875119	364.947	366.766	0.742534	0.480295	46.7001	0.000531	2.19621	0.994079	0.986752	0.978555	0.969807	0.960331	0.950151	0.891821		0	0	0	0	0	0	0.955768	3.9276	21.2% (24.0%)	0.472
PAM43PT5	FFPE	Mesenteric Metastasis	AgilentExon_51MB_hg19_v3	3137282684	51133330	32931921	0.64404	201524644	201524644	201524644	1	1	196936076	0.977231	18648765058	13822926880	1696700973	3129137205	8880013628	0.832207	0.167793	0.890674	270.331	269.825	0.720017	0.462547	45.4778	0.000589	2.36688	0.992524	0.980465	0.966177	0.95095	0.934966	0.918364	0.827803		0	0	0	0	0	0	0.521563	7.10145	14.5% (19.1%)	0.499
PAM43PT6	FFPE	Right Lung	AgilentExon_51MB_hg19_v3	3137282684	51133330	32931921	0.64404	274189786	274189786	274189786	1	1	268401486	0.978889	25573264871	19115394710	2556805306	3901064855	12224045840	0.847455	0.152545	0.882024	373.834	371.418	0.72725	0.465067	45.8613	0.000552	2.33596	0.993736	0.985199	0.975654	0.965669	0.95504	0.943786	0.882749		0	0	0	0	0	0	0.384114	7.365	19.0% (22.1%)	0.513
PAM44N	Frozen	Normal Heart	AgilentExon_51MB_hg19_v3	3137282684	51133330	32931921	0.64404	97990922	97990922	97990922	1	1	96004621	0.97973	9434925842	6961597058	1477910566	995418218	4569585431	0.894496	0.105504	0.824882	136.146	138.861	0.718628	0.471707	45.271	0.000625	2.57149	0.993005	0.979896	0.955837	0.92081	0.876282	0.824404	0.543572		0	0	0	0	0	0	17.3643	1.34627
PAM44PT1	FFPE	Primary Tumor	AgilentExon_51MB_hg19_v3	3137282684	51133330	32931921	0.64404	173425406	173425406	173425406	1	1	167940396	0.968373	15785381040	11384366359	1397987789	3003026892	7374229512	0.809759	0.190241	0.890631	222.641	224.074	0.693416	0.44916	44.249	0.000594	2.21855	0.992574	0.980088	0.964837	0.947444	0.928744	0.909399	0.803449		0	0	0	0	0	0	5.30965	1.84284	15.2% (14.7%)	0.367
PAM44PT2	Frozen	Local Recurrence 1	AgilentExon_51MB_hg19_v3	3137282684	51133330	32931921	0.64404	252286084	252286084	252286084	1	1	246731111	0.977981	24173429339	15745549960	3683528774	4744350605	10278905860	0.803737	0.196263	0.810412	307.931	312.313	0.635883	0.415113	39.964	0.000447	1.96423	0.995832	0.991269	0.985749	0.979785	0.972706	0.96428	0.902998		0	0	0	0	0	0	3.40115	1.40288	25.0% (23.5%)	0.516
PAM44PT3	Frozen	Local Recurrence 2	AgilentExon_51MB_hg19_v3	3137282684	51133330	32931921	0.64404	187202364	187202364	187202364	1	1	182190645	0.973228	17906926025	10879670625	3335476158	3691779242	7158134546	0.793835	0.206165	0.765358	212.771	217.499	0.588425	0.387146	37.2773	0.000526	1.90789	0.995259	0.988718	0.980551	0.971036	0.959423	0.945306	0.839535		0	0	0	0	0	0	2.49796	2.7154	14.7% (15.2%)	0.307
PAM44PT4	Frozen	Liver Metastasis 1	AgilentExon_51MB_hg19_v3	3137282684	51133330	32931921	0.64404	232413710	232413710	232413710	1	1	227396885	0.978414	22367822409	15111937156	3444348487	3811536766	9825832773	0.829597	0.170403	0.814384	295.54	298.542	0.660058	0.429172	41.452	0.000478	1.93858	0.995171	0.989625	0.983626	0.977201	0.969575	0.960424	0.895917		0	0	0	0	0	0	2.0306	1.56091	21.6% (20.9%)	0.444
PAM44PT5	Frozen	Liver Metastasis 2	AgilentExon_51MB_hg19_v3	3137282684	51133330	32931921	0.64404	248118796	248118796	248118796	1	1	241756403	0.974357	23794709408	15445378998	4031819511	4317510899	10237707021	0.818552	0.181448	0.792998	302.061	311.041	0.63139	0.418506	39.8261	0.000473	2.08753	0.995668	0.990512	0.984776	0.97827	0.970471	0.961378	0.895844		0	0	0	0	0	0	8.95006	1.30864	13.8% (13.8%)	0.28
PAM45N	Frozen	Normal Spleen	AgilentExon_51MB_hg19_v3	3137282684	51133330	32931921	0.64404	106555670	106555670	106555670	1	1	103899285	0.97507	10231102595	6516187596	1535666582	2179248417	4314115430	0.786998	0.213002	0.809278	127.435	131.186	0.618413	0.409427	39.077	0.001493	2.01825	0.992997	0.982015	0.965219	0.940846	0.909404	0.871315	0.61046		0	0	0	0	0	0	7.86604	1.14145
PAM45PT1	FFPE	Primary Tumor	AgilentExon_51MB_hg19_v3	3137282684	51133330	32931921	0.64404	278685050	278685050	278685050	1	1	269503363	0.967054	25103971608	17547175358	2051572330	5505223920	11208870252	0.780703	0.219297	0.895321	343.165	340.848	0.670414	0.42825	42.8859	0.001445	2.19902	0.993452	0.984454	0.974289	0.963331	0.951579	0.939324	0.875777		0	0	0	0	0	0	4.84068	1.75165	14.4% (14.7%)	0.301
PAM45PT2	Frozen	Local Recurrence	AgilentExon_51MB_hg19_v3	3137282684	51133330	32931921	0.64404	321255284	321255284	321255284	1	1	313810445	0.976826	30747984819	19284660999	4792306810	6671017010	12619489639	0.783042	0.216958	0.800959	377.145	383.726	0.611558	0.400191	38.4809	0.001414	1.89963	0.995355	0.991516	0.987095	0.982793	0.978093	0.97269	0.932296		0	0	0	0	0	0	2.48455	1.59046	13.6% (14.9%)	0.378
PAM45PT3	Frozen	Abdominal Wall Metastasis 1	AgilentExon_51MB_hg19_v3	3137282684	51133330	32931921	0.64404	227537822	227537822	227537822	1	1	222481994	0.97778	21799638033	14493968839	3404385031	3901284163	9490360299	0.821039	0.178961	0.809793	283.454	288.552	0.648928	0.424905	40.7932	0.001356	1.94967	0.99456	0.989092	0.98306	0.976353	0.968302	0.958593	0.890254		0	0	0	0	0	0	3.19526	1.50763	24.1% (24.6%)	0.534
PAM45PT4	Frozen	Abdominal Wall Metastasis 2	AgilentExon_51MB_hg19_v3	3137282684	51133330	32931921	0.64404	386425792	386425792	386425792	1	1	379586042	0.9823	37471464054	26116494603	6400468227	4954501224	17132882992	0.867779	0.132221	0.803165	510.753	520.982	0.68245	0.447699	42.7626	0.001424	1.95858	0.99521	0.992075	0.988735	0.985535	0.982309	0.978899	0.954738		0	0	0	0	0	0	3.75291	1.32606	27.1% (26.9%)	0.619
PAM45PT5	Frozen	Paraaortic Lymph Node 1	AgilentExon_51MB_hg19_v3	3137282684	51133330	32931921	0.64404	349885624	349885624	349885624	1	1	343823264	0.982673	33700850382	25463608955	4663732460	3573508967	16724154262	0.893964	0.106036	0.845199	497.985	508.555	0.740285	0.486209	46.3584	0.001435	2.22076	0.99496	0.991236	0.987207	0.983198	0.978631	0.973353	0.937584		0	0	0	0	0	0	10.9259	0.776178	12.0% (12.9%)	0.246
PAM45PT6	Frozen	Paraaortic Lymph Node 2	AgilentExon_51MB_hg19_v3	3137282684	51133330	32931921	0.64404	237970742	237970742	237970742	1	1	232895424	0.978673	22889408604	15160151104	3834320075	3894937425	9835461372	0.829837	0.170163	0.798135	296.483	299.076	0.647218	0.419896	40.6367	0.001445	1.86923	0.994558	0.989348	0.983558	0.977591	0.970795	0.96261	0.90212		0	0	0	0	0	0	1.01563	2.40515	12.2% (12.3%)	0.28
PAM45PT7	Frozen	Diaphragm Metastasis	AgilentExon_51MB_hg19_v3	3137282684	51133330	32931921	0.64404	212142420	212142420	212142420	1	1	207940449	0.980193	20440924805	14011476328	3115820086	3313628391	9158342081	0.837892	0.162108	0.818079	274.018	278.497	0.670812	0.438464	42.0565	0.001487	1.97516	0.994348	0.98861	0.98192	0.974437	0.96539	0.95473	0.880256		0	0	0	0	0	0	2.36032	1.93539	19.6% (18.9%)	0.441
PAM45PT8	Frozen	Perirectal Metastasis	AgilentExon_51MB_hg19_v3	3137282684	51133330	32931921	0.64404	290528528	290528528	290528528	1	1	280965409	0.967084	27507269278	14589346649	3819179304	9098743325	9496165102	0.669224	0.330776	0.792532	285.32	288.762	0.512115	0.333335	32.5415	0.001409	1.89975	0.995245	0.990311	0.984405	0.97803	0.970655	0.961751	0.895344		0	0	0	0	0	0	1.42179	2.08016	15.3% (15.2%)	0.316
PAM46N	Frozen	Normal Spleen	AgilentExon_51MB_hg19_v3	3137282684	51133330	32931921	0.64404	126847786	126847786	126847786	1	1	123947904	0.977139	12156056789	8699588053	1778006189	1678462547	5751208088	0.861924	0.138076	0.830304	170.135	174.77	0.696041	0.460146	43.9092	0.000678	2.24064	0.993538	0.983881	0.969991	0.95148	0.928365	0.900886	0.712592		0	0	0	0	0	0	12.2883	0.883093
PAM46PT1	FFPE	Primary Tumor	AgilentExon_51MB_hg19_v3	3137282684	51133330	32931921	0.64404	264932548	264932548	264932548	1	1	257988971	0.973791	24520931790	18267177233	2277668715	3976085842	11630352390	0.837849	0.162151	0.889137	357.246	353.394	0.721198	0.459173	45.7071	0.000557	2.26535	0.993915	0.985443	0.976324	0.966391	0.955597	0.944142	0.881255		0	0	0	0	0	0	3.61334	1.51392	6.4% (9.0%)	0.341
PAM46PT2	Frozen	Local Recurrence 1	AgilentExon_51MB_hg19_v3	3137282684	51133330	32931921	0.64404	263946722	263946722	263946722	1	1	258721855	0.980205	25341561777	16725041365	4102284348	4514236064	10873601166	0.821864	0.178136	0.803034	327.087	330.429	0.645791	0.419854	40.4933	0.000652	1.96684	0.995377	0.990571	0.985061	0.979444	0.972913	0.965141	0.909216		0	0	0	0	0	0	3.16323	1.62834	18.4% (20.9%)	0.443
PAM46PT3	Frozen	Local Recurrence 2	AgilentExon_51MB_hg19_v3	3137282684	51133330	32931921	0.64404	181288452	181288452	181288452	1	1	177678340	0.980086	17453851099	12264307160	2897792834	2291751105	8078204468	0.868697	0.131303	0.808879	239.85	245.489	0.686905	0.452448	43.1123	0.000636	2.25219	0.995007	0.989326	0.982012	0.972269	0.959397	0.943746	0.826356		0	0	0	0	0	0	12.9223	1.06291	15.2% (16.6%)	0.342
PAM46PT4	Frozen	Local Recurrence 3	AgilentExon_51MB_hg19_v3	3137282684	51133330	32931921	0.64404	241187922	241187922	241187922	1	1	235893617	0.978049	23058817343	15640047615	3541955821	3876813907	10268022517	0.831873	0.168127	0.81535	305.868	312.016	0.661981	0.434604	41.6151	0.00061	2.16678	0.995373	0.990215	0.984322	0.977686	0.969464	0.959406	0.887643		0	0	0	0	0	0	9.78071	1.07527	15.9% (20.4%)	0.41
PAM46PT5	Frozen	Local Recurrence 4	AgilentExon_51MB_hg19_v3	3137282684	51133330	32931921	0.64404	506528998	506528998	506528998	1	1	496259586	0.979726	48815985936	33030775401	7930765314	7854445221	21441306688	0.839101	0.160899	0.806385	645.973	651.54	0.661903	0.429662	41.5151	0.000578	2.02342	0.99602	0.993167	0.990329	0.987609	0.984883	0.982043	0.963927		0	0	0	0	0	0	4.20563	1.29153	15.4% (21.7%)	0.501
PAM46PT6	Frozen	Adrenal Metastasis	AgilentExon_51MB_hg19_v3	3137282684	51133330	32931921	0.64404	286435018	286435018	286435018	1	1	279980233	0.977465	27391744222	18308020547	4199376728	4884346947	11960694312	0.821685	0.178315	0.813422	358.045	363.457	0.651956	0.425925	41.0083	0.00062	2.16344	0.995406	0.990495	0.984822	0.978952	0.972326	0.964515	0.908998		0	0	0	0	0	0	7.35346	1.15834	25.4% (27.3%)	0.568
PAM46PT7	Frozen	Vena Cava Metastasis	AgilentExon_51MB_hg19_v3	3137282684	51133330	32931921	0.64404	217735624	217735624	217735624	1	1	210328574	0.965981	20699022156	11395446506	2947819124	6355756526	7467208773	0.692944	0.307056	0.794481	222.858	226.898	0.529576	0.347021	33.7778	0.000615	2.04413	0.99542	0.989272	0.981526	0.971778	0.959159	0.943719	0.831305		0	0	0	0	0	0	6.72577	1.18951	16.9% (20.7%)	0.408
PAM46PT8	Frozen	Kidney Metastasis	AgilentExon_51MB_hg19_v3	3137282684	51133330	32931921	0.64404	264042856	264042856	264042856	1	1	259273051	0.981935	25531211598	17944855521	4299608451	3286747626	11777702996	0.871266	0.128734	0.806711	350.942	357.867	0.689154	0.452311	43.1239	0.00062	2.09279	0.995232	0.990588	0.985707	0.980518	0.974381	0.967207	0.915351		0	0	0	0	0	0	9.09749	1.13061	16.5% (19.7%)	0.379
PAM46PT9	Frozen	Liver Hilum Metastasis	AgilentExon_51MB_hg19_v3	3137282684	51133330	32931921	0.64404	328074952	328074952	328074952	1	1	321000115	0.978435	31474159665	22192558861	5164392799	4117208005	14606511466	0.869188	0.130812	0.811222	434.014	443.833	0.688549	0.453183	43.2616	0.000599	2.14412	0.995781	0.992421	0.988631	0.984716	0.980198	0.974861	0.936445		0	0	0	0	0	0	9.70457	0.89056	15.2% (18.8%)	0.358
																														0.993961	0.986082	0.976097	0.964455	0.950893	0.935491	0.839595

## Sheet: Table S4
Table S4: Genes included in 410 Gene Targeted Panel (MSK-IMPACT™)
Approved Symbol	Approved Name	Num Distinct Exons
ABL1	c-abl oncogene 1, non-receptor tyrosine kinase	12
ACVR1	activin A receptor, type I	9
AKT1	v-akt murine thymoma viral oncogene homolog 1	13
AKT2	v-akt murine thymoma viral oncogene homolog 2	13
AKT3	v-akt murine thymoma viral oncogene homolog 3 (protein kinase B, gamma)	14
ALK	anaplastic lymphoma receptor tyrosine kinase	29
ALOX12B	arachidonate 12-lipoxygenase, 12R type	15
ANKRD11	ankyrin repeat domain 11	12
APC	adenomatous polyposis coli	16
AR	androgen receptor	11
ARAF	v-raf murine sarcoma 3611 viral oncogene homolog	15
ARID1A	AT rich interactive domain 1A (SWI-like)	20
ARID1B	AT rich interactive domain 1B (SWI1-like)	21
ARID2	AT rich interactive domain 2 (ARID, RFX-like)	22
ARID5B	AT rich interactive domain 5B (MRF1-like)	11
ASXL1	additional sex combs like 1 (Drosophila)	14
ASXL2	additional sex combs like 2 (Drosophila)	12
ATM	ataxia telangiectasia mutated	62
ATR	ataxia telangiectasia and Rad3 related	47
ATRX	alpha thalassemia/mental retardation syndrome X-linked	35
AURKA	aurora kinase A	8
AURKB	aurora kinase B	8
AXIN1	axin 1	10
AXIN2	axin 2	10
AXL	AXL receptor tyrosine kinase	20
B2M	beta-2-microglobulin	3
BAP1	BRCA1 associated protein-1 (ubiquitin carboxy-terminal hydrolase)	17
BARD1	BRCA1 associated RING domain 1	11
BBC3	BCL2 binding component 3	4
BCL10	B-cell CLL/lymphoma 10	3
BCL2	B-cell CLL/lymphoma 2	2
BCL2L1	BCL2-like 1	2
BCL2L11	BCL2-like 11 (apoptosis facilitator)	10
BCL6	B-cell CLL/lymphoma 6	8
BCOR	BCL6 corepressor	14
BIRC3	baculoviral IAP repeat-containing 3	8
BLM	Bloom syndrome, RecQ helicase-like	21
BMPR1A	bone morphogenetic protein receptor, type IA	11
BRAF	v-raf murine sarcoma viral oncogene homolog B1	18
BRCA1	breast cancer 1, early onset	23
BRCA2	breast cancer 2, early onset	26
BRD4	bromodomain containing 4	21
BRIP1	BRCA1 interacting protein C-terminal helicase 1	19
BTK	Bruton agammaglobulinemia tyrosine kinase	19
CALR	calreticulin	9
CARD11	caspase recruitment domain family, member 11	24
CASP8	caspase 8, apoptosis-related cysteine peptidase	11
CBFB	core-binding factor, beta subunit	6
CBL	Cas-Br-M (murine) ecotropic retroviral transforming sequence	16
CCND1	cyclin D1	5
CCND2	cyclin D2	5
CCND3	cyclin D3	6
CCNE1	cyclin E1	11
CD274	CD274 molecule	6
CD276	CD276 molecule	9
CD79A	CD79a molecule, immunoglobulin-associated alpha	5
CD79B	CD79b molecule, immunoglobulin-associated beta	6
CDC73	cell division cycle 73, Paf1/RNA polymerase II complex component, homolog (S. cerevisiae)	17
CDH1	cadherin 1, type 1, E-cadherin (epithelial)	16
CDK12	cyclin-dependent kinase 12	14
CDK4	cyclin-dependent kinase 4	7
CDK6	cyclin-dependent kinase 6	7
CDK8	cyclin-dependent kinase 8	13
CDKN1A	cyclin-dependent kinase inhibitor 1A (p21, Cip1)	3
CDKN1B	cyclin-dependent kinase inhibitor 1B (p27, Kip1)	2
CDKN2A	cyclin-dependent kinase inhibitor 2A (melanoma, p16, inhibits CDK4)	5
CDKN2B	cyclin-dependent kinase inhibitor 2B (p15, inhibits CDK4)	2
CDKN2C	cyclin-dependent kinase inhibitor 2C (p18, inhibits CDK4)	2
CEBPA	CCAAT/enhancer binding protein (C/EBP), alpha	1
CENPA	centromere protein A	4
CHEK1	CHK1 checkpoint homolog (S. pombe)	12
CHEK2	CHK2 checkpoint homolog (S. pombe)	15
CIC	capicua homolog (Drosophila)	20
CREBBP	CREB binding protein	31
CRKL	v-crk sarcoma virus CT10 oncogene homolog (avian)-like	3
CRLF2	cytokine receptor-like factor 2	6
CSF1R	colony stimulating factor 1 receptor	21
CSF3R	colony stimulating factor 3 receptor (granulocyte)	16
CTCF	CCCTC-binding factor (zinc finger protein)	10
CTLA4	cytotoxic T-lymphocyte-associated protein 4	4
CTNNB1	catenin (cadherin-associated protein), beta 1, 88kDa	14
CUL3	cullin 3	17
CXCR4	chemokine (C-X-C motif) receptor 4	2
DAXX	death-domain associated protein	8
DCUN1D1	DCN1, defective in cullin neddylation 1, domain containing 1 (S. cerevisiae)	7
DDR2	discoidin domain receptor tyrosine kinase 2	16
DICER1	dicer 1, ribonuclease type III	26
DIS3	DIS3 mitotic control homolog (S. cerevisiae)	22
DNAJB1	DnaJ (Hsp40) homolog, subfamily B, member 1	3
DNMT1	DNA (cytosine-5-)-methyltransferase 1	41
DNMT3A	DNA (cytosine-5-)-methyltransferase 3 alpha	24
DNMT3B	DNA (cytosine-5-)-methyltransferase 3 beta	23
DOT1L	DOT1-like, histone H3 methyltransferase (S. cerevisiae)	29
E2F3	E2F transcription factor 3	8
EED	embryonic ectoderm development	13
EGFL7	EGF-like-domain, multiple 7	8
EGFR	epidermal growth factor receptor	30
EIF1AX	eukaryotic translation initiation factor 1A, X-linked	7
EIF4A2	eukaryotic translation initiation factor 4A2	11
EIF4E	eukaryotic translation initiation factor 4E	9
EP300	E1A binding protein p300	31
EPCAM	epithelial cell adhesion molecule	9
EPHA3	EPH receptor A3	17
EPHA5	EPH receptor A5	18
EPHA7	EPH receptor A7	17
EPHB1	EPH receptor B1	16
ERBB2	v-erb-b2 erythroblastic leukemia viral oncogene homolog 2, neuro/glioblastoma derived oncogene homolog (avian)	29
ERBB3	v-erb-b2 erythroblastic leukemia viral oncogene homolog 3 (avian)	28
ERBB4	v-erb-a erythroblastic leukemia viral oncogene homolog 4 (avian)	29
ERCC2	excision repair cross-complementing rodent repair deficiency, complementation group 2	24
ERCC3	excision repair cross-complementing rodent repair deficiency, complementation group 3 (xeroderma pigmentosum group B complementing)	15
ERCC4	excision repair cross-complementing rodent repair deficiency, complementation group 4	11
ERCC5	excision repair cross-complementing rodent repair deficiency, complementation group 5	15
ERG	v-ets erythroblastosis virus E26 oncogene homolog (avian)	12
ERRFI1	ERBB receptor feedback inhibitor 1	3
ESR1	estrogen receptor 1	9
ETV1	ets variant 1	13
ETV6	ets variant 6	9
EZH2	enhancer of zeste homolog 2 (Drosophila)	19
FAM123B	family with sequence similarity 123B	1
FAM175A	family with sequence similarity 175, member A	9
FAM46C	family with sequence similarity 46, member C	1
FANCA	Fanconi anemia, complementation group A	44
FANCC	Fanconi anemia, complementation group C	15
FAT1	FAT tumor suppressor homolog 1 (Drosophila)	26
FBXW7	F-box and WD repeat domain containing 7	14
FGF19	fibroblast growth factor 19	3
FGF3	fibroblast growth factor 3	3
FGF4	fibroblast growth factor 4	3
FGFR1	fibroblast growth factor receptor 1	19
FGFR2	fibroblast growth factor receptor 2	20
FGFR3	fibroblast growth factor receptor 3	19
FGFR4	fibroblast growth factor receptor 4	16
FH	fumarate hydratase	10
FLCN	folliculin	11
FLT1	fms-related tyrosine kinase 1 (vascular endothelial growth factor/vascular permeability factor receptor)	33
FLT3	fms-related tyrosine kinase 3	24
FLT4	fms-related tyrosine kinase 4	31
FOXA1	forkhead box A1	2
FOXL2	forkhead box L2	1
FOXO1	forkhead box O1	3
FOXP1	forkhead box P1	20
FUBP1	far upstream element (FUSE) binding protein 1	21
FYN	FYN oncogene related to SRC, FGR, YES	12
GATA1	GATA binding protein 1 (globin transcription factor 1)	5
GATA2	GATA binding protein 2	5
GATA3	GATA binding protein 3	5
GLI1	GLI family zinc finger 1	11
GNA11	guanine nucleotide binding protein (G protein), alpha 11 (Gq class)	7
GNAQ	guanine nucleotide binding protein (G protein), q polypeptide	7
GNAS	GNAS complex locus	15
GPS2	G protein pathway suppressor 2	10
GREM1	gremlin 1	1
GRIN2A	glutamate receptor, ionotropic, N-methyl D-aspartate 2A	12
GSK3B	glycogen synthase kinase 3 beta	12
H3F3A	H3 histone, family 3A	3
H3F3B	H3 histone, family 3B (H3.3B)	3
H3F3C	H3 histone, family 3C	1
HGF	hepatocyte growth factor (hepapoietin A; scatter factor)	19
HIST1H1C	histone cluster 1, H1c	1
HIST1H2BD	histone cluster 1, H2bd	1
HIST1H3A	histone cluster 1, H3a	1
HIST1H3B	histone cluster 1, H3b	1
HIST1H3C	histone cluster 1, H3c	1
HIST1H3D	histone cluster 1, H3d	1
HIST1H3E	histone cluster 1, H3e	1
HIST1H3F	histone cluster 1, H3f	3
HIST1H3G	histone cluster 1, H3g	1
HIST1H3H	histone cluster 1, H3h	1
HIST1H3I	histone cluster 1, H3i	1
HIST1H3J	histone cluster 1, H3j	1
HIST2H3C	histone cluster 2, H3c	2
HIST2H3D	histone cluster 2, H3d	1
HIST3H3	histone cluster 3, H3	1
HLA-A	major histocompatibility complex, class I, A	8
HNF1A	HNF1 homeobox A	9
HOXB13	homeobox B13	2
HRAS	v-Ha-ras Harvey rat sarcoma viral oncogene homolog	5
ICOSLG	inducible T-cell co-stimulator ligand	7
ID3	inhibitor of DNA binding 3, dominant negative helix-loop-helix protein	2
IDH1	isocitrate dehydrogenase 1 (NADP+), soluble	8
IDH2	isocitrate dehydrogenase 2 (NADP+), mitochondrial	11
IFNGR1	interferon gamma receptor 1	9
IGF1	insulin-like growth factor 1 (somatomedin C)	6
IGF1R	insulin-like growth factor 1 receptor	21
IGF2	insulin-like growth factor 2 (somatomedin A)	4
IKBKE	inhibitor of kappa light polypeptide gene enhancer in B-cells, kinase epsilon	20
IKZF1	IKAROS family zinc finger 1 (Ikaros)	7
IL10	interleukin 10	5
IL7R	interleukin 7 receptor	8
INHA	inhibin, alpha	2
INHBA	inhibin, beta A	2
INPP4A	inositol polyphosphate-4-phosphatase, type I, 107kDa	25
INPP4B	inositol polyphosphate-4-phosphatase, type II, 105kDa	24
INSR	insulin receptor	22
IRF4	interferon regulatory factor 4	9
IRS1	insulin receptor substrate 1	1
IRS2	insulin receptor substrate 2	2
JAK1	Janus kinase 1	24
JAK2	Janus kinase 2	23
JAK3	Janus kinase 3	24
JUN	jun proto-oncogene	1
KDM5A	lysine (K)-specific demethylase 5A	28
KDM5C	lysine (K)-specific demethylase 5C	27
KDM6A	lysine (K)-specific demethylase 6A	30
KDR	kinase insert domain receptor (a type III receptor tyrosine kinase)	30
KEAP1	kelch-like ECH-associated protein 1	5
KIT	v-kit Hardy-Zuckerman 4 feline sarcoma viral oncogene homolog	21
KLF4	Kruppel-like factor 4 (gut)	5
KRAS	v-Ki-ras2 Kirsten rat sarcoma viral oncogene homolog	5
LATS1	LATS, large tumor suppressor, homolog 1 (Drosophila)	7
LATS2	LATS, large tumor suppressor, homolog 2 (Drosophila)	7
LMO1	LIM domain only 1 (rhombotin 1)	5
MALT1	mucosa associated lymphoid tissue lymphoma translocation gene 1	17
MAP2K1	mitogen-activated protein kinase kinase 1	12
MAP2K2	mitogen-activated protein kinase kinase 2	11
MAP2K4	mitogen-activated protein kinase kinase 4	13
MAP3K1	mitogen-activated protein kinase kinase kinase 1	20
MAP3K13	mitogen-activated protein kinase kinase kinase 13	15
MAP3K14	mitogen-activated protein kinase kinase kinase 14	16
MAPK1	mitogen-activated protein kinase 1	8
MAPK3	mitogen-activated protein kinase 3	8
MAX	MYC associated factor X	10
MCL1	myeloid cell leukemia sequence 1 (BCL2-related)	3
MDC1	mediator of DNA-damage checkpoint 1	14
MDM2	Mdm2 p53 binding protein homolog (mouse)	11
MDM4	Mdm4 p53 binding protein homolog (mouse)	10
MED12	mediator complex subunit 12	45
MEF2B	myocyte enhancer factor 2B	8
MEN1	multiple endocrine neoplasia I	9
MET	met proto-oncogene (hepatocyte growth factor receptor)	20
MGA	MAX gene associated	23
MITF	microphthalmia-associated transcription factor	14
MLH1	mutL homolog 1, colon cancer, nonpolyposis type 2 (E. coli)	20
MLL	myeloid/lymphoid or mixed-lineage leukemia (trithorax homolog, Drosophila)	36
MLL2	myeloid/lymphoid or mixed-lineage leukemia 2	54
MLL3	myeloid/lymphoid or mixed-lineage leukemia 3	60
MPL	myeloproliferative leukemia virus oncogene	12
MRE11A	MRE11 meiotic recombination 11 homolog A (S. cerevisiae)	19
MSH2	mutS homolog 2, colon cancer, nonpolyposis type 1 (E. coli)	19
MSH6	mutS homolog 6 (E. coli)	10
MST1	macrophage stimulating 1 (hepatocyte growth factor-like)	18
MST1R	macrophage stimulating 1 receptor (c-met-related tyrosine kinase)	20
MTOR	mechanistic target of rapamycin (serine/threonine kinase)	57
MUTYH	mutY homolog (E. coli)	16
MYC	v-myc myelocytomatosis viral oncogene homolog (avian)	3
MYCL1	v-myc myelocytomatosis viral oncogene homolog 1, lung carcinoma derived (avian)	3
MYCN	v-myc myelocytomatosis viral related oncogene, neuroblastoma derived (avian)	2
MYD88	myeloid differentiation primary response gene (88)	5
MYOD1	myogenic differentiation 1	3
NBN	nibrin	16
NCOA3	nuclear receptor coactivator 3	21
NCOR1	nuclear receptor corepressor 1	46
NEGR1	neuronal growth regulator 1	7
NF1	neurofibromin 1	59
NF2	neurofibromin 2 (merlin)	17
NFE2L2	nuclear factor (erythroid-derived 2)-like 2	5
NFKBIA	nuclear factor of kappa light polypeptide gene enhancer in B-cells inhibitor, alpha	6
NKX2-1	NK2 homeobox 1	3
NKX3-1	NK3 homeobox 1	2
NOTCH1	notch 1	34
NOTCH2	notch 2	34
NOTCH3	notch 3	33
NOTCH4	notch 4	30
NPM1	nucleophosmin (nucleolar phosphoprotein B23, numatrin)	12
NRAS	neuroblastoma RAS viral (v-ras) oncogene homolog	4
NSD1	nuclear receptor binding SET domain protein 1	22
NTRK1	neurotrophic tyrosine kinase, receptor, type 1	19
NTRK2	neurotrophic tyrosine kinase, receptor, type 2	20
NTRK3	neurotrophic tyrosine kinase, receptor, type 3	21
NUP93	nucleoporin 93kDa	21
PAK1	p21 protein (Cdc42/Rac)-activated kinase 1	16
PAK7	p21 protein (Cdc42/Rac)-activated kinase 7	8
PALB2	partner and localizer of BRCA2	13
PARK2	parkinson protein 2, E3 ubiquitin protein ligase (parkin)	16
PARP1	poly (ADP-ribose) polymerase 1	23
PAX5	paired box 5	11
PBRM1	polybromo 1	31
PDCD1	programmed cell death 1	5
PDGFRA	platelet-derived growth factor receptor, alpha polypeptide	34
PDGFRB	platelet-derived growth factor receptor, beta polypeptide	22
PDPK1	3-phosphoinositide dependent protein kinase-1	23
PGR	progesterone receptor	8
PHOX2B	paired-like homeobox 2b	3
PIK3C2G	phosphoinositide-3-kinase, class 2, gamma polypeptide	32
PIK3C3	phosphoinositide-3-kinase, class 3	25
PIK3CA	phosphoinositide-3-kinase, catalytic, alpha polypeptide	20
PIK3CB	phosphoinositide-3-kinase, catalytic, beta polypeptide	22
PIK3CD	phosphoinositide-3-kinase, catalytic, delta polypeptide	22
PIK3CG	phosphoinositide-3-kinase, catalytic, gamma polypeptide	10
PIK3R1	phosphoinositide-3-kinase, regulatory subunit 1 (alpha)	17
PIK3R2	phosphoinositide-3-kinase, regulatory subunit 2 (beta)	15
PIK3R3	phosphoinositide-3-kinase, regulatory subunit 3 (gamma)	12
PIM1	pim-1 oncogene	7
PLCG2	phospholipase C, gamma 2 (phosphatidylinositol-specific)	32
PLK2	polo-like kinase 2	14
PMAIP1	phorbol-12-myristate-13-acetate-induced protein 1	2
PMS1	PMS1 postmeiotic segregation increased 1 (S. cerevisiae)	13
PMS2	PMS2 postmeiotic segregation increased 2 (S. cerevisiae)	15
PNRC1	proline-rich nuclear receptor coactivator 1	2
POLD1	polymerase (DNA directed), delta 1, catalytic subunit 125kDa	26
POLE	polymerase (DNA directed), epsilon	49
PPM1D	protein phosphatase, Mg2+/Mn2+ dependent, 1D	6
PPP2R1A	protein phosphatase 2, regulatory subunit A, alpha	15
PPP6C	protein phosphatase 6, catalytic subunit	8
PRDM1	PR domain containing 1, with ZNF domain	8
PRKAR1A	protein kinase, cAMP-dependent, regulatory, type I, alpha (tissue specific extinguisher 1)	11
PTCH1	patched 1	25
PTEN	phosphatase and tensin homolog	9
PTPN11	protein tyrosine phosphatase, non-receptor type 11	15
PTPRD	protein tyrosine phosphatase, receptor type, D	37
PTPRS	protein tyrosine phosphatase, receptor type, S	39
PTPRT	protein tyrosine phosphatase, receptor type, T	32
RAB35	RAB35, member RAS oncogene family	6
RAC1	ras-related C3 botulinum toxin substrate 1 (rho family, small GTP binding protein Rac1)	7
RAD21	RAD21 homolog (S. pombe)	13
RAD50	RAD50 homolog (S. cerevisiae)	25
RAD51	RAD51 homolog (RecA homolog, E. coli) (S. cerevisiae)	10
RAD51C	RAD51 homolog C (S. cerevisiae)	9
RAD51L1	RAD51-like 1 (S. cerevisiae)	13
RAD51L3	RAD51-like 3 (S. cerevisiae)	11
RAD52	RAD52 homolog (S. cerevisiae)	11
RAD54L	RAD54-like (S. cerevisiae)	18
RAF1	v-raf-1 murine leukemia viral oncogene homolog 1	16
RARA	retinoic acid receptor, alpha	11
RASA1	RAS p21 protein activator (GTPase activating protein) 1	28
RB1	retinoblastoma 1	27
RBM10	RNA binding motif protein 10	24
RECQL4	RecQ protein-like 4	22
REL	v-rel reticuloendotheliosis viral oncogene homolog (avian)	11
RET	ret proto-oncogene	20
RFWD2	ring finger and WD repeat domain 2	21
RHEB	Ras homolog enriched in brain	8
RHOA	ras homolog gene family, member A	4
RICTOR	RPTOR independent companion of MTOR, complex 2	39
RIT1	Ras-like without CAAX 1	6
RNF43	ring finger protein 43	9
ROS1	c-ros oncogene 1 , receptor tyrosine kinase	43
RPS6KA4	ribosomal protein S6 kinase, 90kDa, polypeptide 4	17
RPS6KB2	ribosomal protein S6 kinase, 70kDa, polypeptide 2	15
RPTOR	regulatory associated protein of MTOR, complex 1	34
RUNX1	runt-related transcription factor 1	9
RYBP	RING1 and YY1 binding protein	4
SDHA	succinate dehydrogenase complex, subunit A, flavoprotein (Fp)	15
SDHAF2	succinate dehydrogenase complex assembly factor 2	4
SDHB	succinate dehydrogenase complex, subunit B, iron sulfur (Ip)	8
SDHC	succinate dehydrogenase complex, subunit C, integral membrane protein, 15kDa	7
SDHD	succinate dehydrogenase complex, subunit D, integral membrane protein	6
SETD2	SET domain containing 2	22
SF3B1	splicing factor 3b, subunit 1, 155kDa	26
SH2B3	SH2B adaptor protein 3	8
SH2D1A	SH2 domain containing 1A	4
SHQ1	SHQ1 homolog (S. cerevisiae)	11
SMAD2	SMAD family member 2	10
SMAD3	SMAD family member 3	10
SMAD4	SMAD family member 4	11
SMARCA4	SWI/SNF related, matrix associated, actin dependent regulator of chromatin, subfamily a, member 4	35
SMARCB1	SWI/SNF related, matrix associated, actin dependent regulator of chromatin, subfamily b, member 1	10
SMARCD1	SWI/SNF related, matrix associated, actin dependent regulator of chromatin, subfamily d, member 1	13
SMO	smoothened homolog (Drosophila)	12
SOCS1	suppressor of cytokine signaling 1	1
SOX17	SRY (sex determining region Y)-box 17	2
SOX2	SRY (sex determining region Y)-box 2	1
SOX9	SRY (sex determining region Y)-box 9	3
SPEN	spen homolog, transcriptional regulator (Drosophila)	16
SPOP	speckle-type POZ protein	9
SRC	v-src sarcoma (Schmidt-Ruppin A-2) viral oncogene homolog (avian)	11
SRSF2	serine/arginine-rich splicing factor 2	2
STAG2	stromal antigen 2	33
STAT3	signal transducer and activator of transcription 3 (acute-phase response factor)	23
STAT5A	signal transducer and activator of transcription 5A	18
STAT5B	signal transducer and activator of transcription 5B	18
STK11	serine/threonine kinase 11	9
STK40	serine/threonine kinase 40	10
SUFU	suppressor of fused homolog (Drosophila)	13
SUZ12	suppressor of zeste 12 homolog (Drosophila)	16
SYK	spleen tyrosine kinase	13
TBX3	T-box 3	8
TCEB1	transcription elongation factor B (SIII), polypeptide 1 (15kDa, elongin C)	3
TCF3	transcription factor 3 (E2A immunoglobulin enhancer binding factors E12/E47)	19
TCF7L2	transcription factor 7-like 2 (T-cell specific, HMG-box)	20
TERT	telomerase reverse transcriptase	16
TET1	tet oncogene 1	11
TET2	tet oncogene family member 2	10
TGFBR1	transforming growth factor, beta receptor 1	9
TGFBR2	transforming growth factor, beta receptor II (70/80kDa)	8
TMEM127	transmembrane protein 127	3
TMPRSS2	transmembrane protease, serine 2	14
TNFAIP3	tumor necrosis factor, alpha-induced protein 3	8
TNFRSF14	tumor necrosis factor receptor superfamily, member 14 (herpesvirus entry mediator)	9
TOP1	topoisomerase (DNA) I	21
TP53	tumor protein p53	16
TP63	tumor protein p63	16
TRAF2	TNF receptor-associated factor 2	10
TRAF7	TNF receptor-associated factor 7	20
TSC1	tuberous sclerosis 1	21
TSC2	tuberous sclerosis 2	41
TSHR	thyroid stimulating hormone receptor	11
U2AF1	U2 small nuclear RNA auxiliary factor 1	9
VEGFA	vascular endothelial growth factor A	9
VHL	von Hippel-Lindau tumor suppressor	3
VTCN1	V-set domain containing T cell activation inhibitor 1	5
WT1	Wilms tumor 1	11
XIAP	X-linked inhibitor of apoptosis	6
XPO1	exportin 1 (CRM1 homolog, yeast)	24
XRCC2	X-ray repair complementing defective repair in Chinese hamster cells 2	3
YAP1	Yes-associated protein 1	9
YES1	v-yes-1 Yamaguchi sarcoma viral oncogene homolog 1	11
ZFHX3	zinc finger homeobox 3	9
ZRSR2	zinc finger (CCCH type), RNA-binding motif and serine/arginine rich 2	11

## Sheet: Table S5
Table S5: Sum of Filtered Variants by Type
									CODING VARIANTS
Sample ID	Intron	Silent	RNA	3'Flank	3'UTR	5'Flank	5'UTR	IGR	Targeted_Region	Frame_Shift_Del	Frame_Shift_Ins	In_Frame_Del	In_Frame_Ins	Missense_Mutation	Nonsense_Mutation	Nonstop_Mutation	Splice_Site	Translation_Start_Site	Sum all variants per sample	Sum coding variants per sample
s_PAM37PT1	113	43	1	10	9	4	3	0	0	3	2	1	0	48	4	0	2	0	243	60
s_PAM37PT3	205	343	3	7	27	9	18	1	0	3	2	0	1	146	6	0	5	0	776	163
s_PAM37PT4	203	68	23	15	16	16	11	3	0	3	2	0	1	140	6	0	6	0	513	158
s_PAM37PT5	211	164	6	9	19	11	7	1	0	6	2	1	0	183	5	0	6	0	631	203
s_PAM37PT6	183	100	6	6	14	10	7	2	0	6	2	1	0	139	6	0	6	0	488	160	161.5
s_PAM38PT1	49	7	1	1	0	2	4	1	0	0	0	0	0	16	2	0	0	0	83	18
s_PAM38PT2	45	13	1	2	1	3	4	1	0	4	1	0	0	23	3	0	1	0	102	32
s_PAM38PT3	34	12	0	1	1	3	4	0	0	1	1	0	0	33	1	0	0	0	91	36
s_PAM38PT4	47	29	0	3	6	6	4	0	0	1	1	1	0	49	2	0	0	0	149	54	36
s_PAM39PT1	73	10	1	3	5	4	4	1	0	3	1	1	0	40	2	0	0	0	148	47
s_PAM39PT2	142	15	1	6	4	6	3	1	0	3	1	1	0	55	4	0	0	0	242	64
s_PAM39PT3	119	11	1	3	5	10	6	0	0	3	1	1	0	41	2	0	0	0	203	48
s_PAM39PT4	95	11	0	3	6	7	3	0	0	1	0	0	0	38	3	0	0	0	167	42
s_PAM39PT5	118	11	4	4	23	7	5	3	0	3	1	2	0	48	4	0	0	0	233	58
s_PAM39PT6	118	12	3	3	13	8	3	0	0	3	1	1	0	48	2	0	1	0	216	56
s_PAM39PT7	176	14	2	8	16	5	8	0	0	3	1	2	0	44	3	0	0	0	282	53
s_PAM39PT8	135	13	2	5	14	5	10	1	0	2	1	1	0	40	3	0	0	0	232	47
s_PAM39PT9	97	13	2	5	3	6	2	0	0	3	1	1	0	48	3	0	0	0	184	56	54.5
s_PAM40PT1	50	8	0	0	6	0	1	0	0	0	0	0	0	17	0	0	0	0	82	17
s_PAM40PT2	242	28	7	4	6	5	14	1	1	7	2	3	1	98	2	0	2	0	423	116
s_PAM40PT3	219	28	7	4	15	7	12	0	1	9	2	3	1	100	2	0	3	0	413	121
s_PAM40PT4	256	33	10	7	11	6	15	1	1	9	2	3	1	112	4	0	3	0	474	135
s_PAM40PT5	235	22	10	7	9	8	15	0	1	6	3	2	1	88	3	1	7	0	418	112
s_PAM40PT6	194	30	10	4	8	9	15	0	1	6	3	2	2	99	4	0	4	0	391	121
s_PAM40PT7	203	31	13	3	6	10	13	0	1	6	4	2	2	105	3	0	5	0	407	128
s_PAM40PT8	264	23	10	6	16	6	15	1	1	7	3	2	1	103	2	0	4	0	464	123	121
s_PAM41PT1	41	8	1	2	0	1	5	0	0	0	0	0	0	25	2	0	2	0	87	29
s_PAM41PT10	180	35	7	6	14	2	8	1	0	1	0	2	0	78	5	0	6	0	345	92
s_PAM41PT11	144	30	6	5	6	7	6	1	0	2	0	2	0	67	4	0	5	0	285	80
s_PAM41PT2	175	23	9	5	17	5	8	1	0	3	0	3	0	70	3	0	4	0	326	83
s_PAM41PT3	135	22	1	8	11	5	9	2	0	1	0	3	0	71	3	0	2	0	273	80
s_PAM41PT4	110	21	7	6	8	4	8	0	0	1	1	1	0	47	4	0	4	0	222	58
s_PAM41PT5	259	40	8	9	15	13	10	2	0	2	1	1	0	108	6	1	6	0	481	125
s_PAM41PT6	236	31	6	5	10	10	8	1	0	1	1	0	0	65	4	0	3	0	381	74
s_PAM41PT7	307	41	11	8	28	14	9	1	0	0	1	3	0	97	2	0	2	0	524	105
s_PAM41PT8	156	22	8	6	13	3	9	1	0	1	1	2	0	60	2	0	6	0	290	72
s_PAM41PT9	236	30	8	5	14	2	9	1	0	2	0	1	0	73	4	0	5	0	390	85	81.5
s_PAM42PT1	55	13	0	3	2	2	4	2	0	1	0	0	0	18	3	0	0	0	103	22
s_PAM42PT2	94	18	1	4	1	1	3	2	0	1	4	0	0	35	4	0	0	0	168	44
s_PAM42PT3	91	17	3	4	7	1	5	5	0	2	4	0	0	36	4	0	0	0	179	46
s_PAM42PT4	71	16	1	3	0	2	7	2	0	2	3	0	1	32	3	0	0	0	143	41
s_PAM42PT5	70	15	4	3	3	1	11	2	0	1	3	3	0	33	3	0	0	0	152	43
s_PAM42PT6	50	13	2	2	3	5	3	4	0	2	0	1	0	21	3	0	0	0	109	27	43
s_PAM43PT1	64	14	4	2	5	3	4	0	0	2	1	1	0	45	3	0	0	0	148	52
s_PAM43PT2	25	14	3	2	3	6	2	1	0	2	1	1	0	38	3	0	0	0	101	45
s_PAM43PT3	79	17	6	4	4	7	3	1	0	3	2	4	0	48	2	0	0	0	180	59
s_PAM43PT4	141	19	8	9	6	8	4	1	0	3	2	4	0	52	2	0	0	0	259	63
s_PAM43PT5	86	28	6	3	8	6	8	0	0	2	1	1	0	77	4	0	0	0	230	85
s_PAM43PT6	70	16	5	3	6	4	7	0	0	4	1	1	0	49	2	0	0	0	168	57	59
s_PAM44PT1	47	18	1	0	3	1	1	1	0	1	1	0	0	30	3	0	1	0	108	36
s_PAM44PT2	118	22	5	2	7	5	4	0	0	7	1	1	0	42	3	0	1	0	218	55
s_PAM44PT3	117	17	4	1	9	3	4	0	0	6	1	1	0	29	0	0	1	0	193	38
s_PAM44PT4	143	21	6	2	12	3	6	1	0	7	1	1	0	39	3	0	1	0	246	52
s_PAM44PT5	153	21	5	7	9	2	5	0	0	6	1	1	0	44	3	0	2	0	259	57	53.5
s_PAM45PT1	37	16	1	4	4	0	4	0	0	1	1	0	0	26	1	0	0	0	95	29
s_PAM45PT2	169	25	5	8	11	5	9	0	0	1	1	0	0	52	3	0	0	0	289	57
s_PAM45PT3	122	24	4	5	12	5	11	0	0	3	2	2	0	40	2	0	1	0	233	50
s_PAM45PT4	90	25	4	6	7	5	11	1	0	3	2	1	0	40	2	0	0	0	197	48
s_PAM45PT5	137	17	5	8	7	8	7	0	0	6	1	1	0	31	1	0	2	0	231	42
s_PAM45PT6	136	20	3	5	10	3	8	0	0	5	0	1	0	43	1	0	1	0	236	51
s_PAM45PT7	131	21	2	4	10	5	9	0	0	3	3	1	0	48	3	0	1	0	241	59
s_PAM45PT8	142	24	3	6	13	4	8	0	0	3	2	1	0	54	2	0	0	0	262	62	51
s_PAM46PT1	138	172	1	0	23	5	13	0	0	1	0	0	0	52	2	0	1	0	408	56
s_PAM46PT2	180	13	4	3	11	4	6	0	0	5	1	3	2	59	1	0	2	0	294	73
s_PAM46PT3	121	13	5	3	7	5	3	0	0	4	1	4	2	45	1	0	2	0	216	59
s_PAM46PT4	151	16	5	4	11	3	6	0	0	7	0	1	1	47	4	0	0	0	256	60
s_PAM46PT5	216	19	4	4	14	7	12	1	0	5	2	2	2	50	1	0	4	0	343	66
s_PAM46PT6	189	15	5	0	18	4	7	0	0	7	1	1	1	50	2	0	3	0	303	65
s_PAM46PT7	98	9	5	1	10	2	4	0	0	7	0	1	1	36	1	0	0	0	175	46
s_PAM46PT8	185	11	4	2	19	4	7	0	0	6	0	1	1	48	3	0	0	0	291	59
s_PAM46PT9	207	16	6	1	17	4	9	1	0	7	0	1	1	36	4	0	0	0	310	49	59.5
																			19003	4864

## Sheet: Table S6
Table S6: Variants that passed Likely Functional Driver Gene Analysis (LiFD)
PAM	Sample(s)	Chromosome	Position	Change	Gene	Variant Classification	HGVSc	HGVSp	Clonality	LiFuDriM	TCGADrClf	CGC_region	hotspot	oncoKB_allvar	oncoKB_actvar	CGI_known_driver	MutationEffect	impact	COSMIC_cnt	COSMIC_cnt_norm	FATHMM	CHASMplus_Score	CHASMplus_CT_Score	CHASMplus_Pvalue_corr	mlog_CHASMplus_Pvalue_corr	CHASMplus_CT_Pvalue_corr	mlog_CHASMplus_CT_Pvalue_corr	CanDrA_clf	CanDrA_score	CanDrA_significance	PolyPhen	Sift	cadd_phred	CGI_driver	CGI_predicted_driver	CGI_driver_gene	Functional	AA_change
37	All	9	21970899	A>C	CDKN2A	Splice_Site	c.457+2N>G		Clonal	TRUE	TRUE	TRUE	FALSE	FALSE	FALSE	FALSE	SpliceDonor	HIGH	0	0													22.4	predicted	TRUE	tumor_driver	TRUE
37	All	12	25398284	C>A	KRAS	Missense_Mutation	c.35N>T	p.Gly12Val	Clonal	TRUE	TRUE	TRUE	TRUE	TRUE	FALSE	TRUE	Substitution	MODERATE	1319	0.0516931	-2.32	0.936	0.913	5.36923e-11	23.6478	4.98571e-11	23.7219	Driver	10.757	0.085632	0.972	0	29.9	known	TRUE	tumor_driver	TRUE	G12V
37	All	1	120612003	GG>-	NOTCH2	Frame_Shift_Del	c.17_18delNN	p.Pro6ArgfsTer27	Clonal	TRUE	TRUE	TRUE	FALSE	FALSE	FALSE	FALSE	FrameShift		25	0.000979777													25.6	other	FALSE	other_tumor_driver	TRUE
37	All	17	7579530	->TTGTG	TP53	Frame_Shift_Ins	c.156_157insCACAA	p.Trp53HisfsTer72	Clonal	TRUE	TRUE	TRUE	FALSE	FALSE	FALSE	FALSE	FrameShift	HIGH	0	0													11.73	predicted	TRUE	tumor_driver	TRUE
38	All	9	21971111	G>A	CDKN2A	Missense_Mutation	c.247N>T	p.His83Tyr	Clonal	TRUE	TRUE	TRUE	TRUE	TRUE	FALSE	TRUE	Substitution	MODERATE	0	0	-1.6	0.782	0.722	5.36923e-11	23.6478	4.98571e-11	23.7219	Driver	6.9745	0.11221	1	0	28.6	known	TRUE	tumor_driver	TRUE	H83Y
38	All	12	25398281	C>G	KRAS	Missense_Mutation	c.37N>C; c.38N>C	p.Gly13Pro	Clonal	TRUE	TRUE	TRUE	TRUE	FALSE	FALSE	TRUE	Substitution	MODERATE	0	0	-2.64	0.913	0.733	5.36923e-11	23.6478	4.98571e-11	23.7219	Driver	10.5854	0.08819	0.398	0.02	24.7	known	TRUE	tumor_driver	TRUE	G13A
38	All	18	48573573	G>T	SMAD4	Nonsense_Mutation	c.157N>T	p.Glu53Ter	Clonal	TRUE	TRUE	TRUE	FALSE	FALSE	FALSE	FALSE	PrematureStop	HIGH	0	0													37	predicted	TRUE	tumor_driver	TRUE	E53*
38	All	17	7578530	ACATCT>-	TP53	In_Frame_Del	c.394N>C; c.395_400delNNNNNN	p.Lys132_Phe134delinsIle	Clonal	TRUE	TRUE	TRUE	FALSE	FALSE	FALSE	FALSE	ComplexSubstitution		0	0													23.3	predicted	TRUE	tumor_driver	TRUE
38	PT3	2	61719472	G>A	XPO1	Missense_Mutation	c.1711G>A	p.E571K	Subclonal	TRUE	TRUE	TRUE	FALSE	FALSE	FALSE	FALSE	unknown	HIGH	32	0.00125412													44	predicted	TRUE	other_tumor_driver	TRUE
39	All	1	27106667	T>-	ARID1A	Frame_Shift_Del	c.6278delN	p.Cys2094AlafsTer41	Clonal	TRUE	TRUE	TRUE	FALSE	FALSE	FALSE	FALSE	FrameShift		0	0													35	predicted	TRUE	tumor_driver	TRUE
39	All	12	25398284	C>T	KRAS	Missense_Mutation	c.35N>A	p.Gly12Asp	Clonal	TRUE	TRUE	TRUE	TRUE	TRUE	FALSE	TRUE	Substitution	MODERATE	1079	0.0422872	-2.32	0.936	0.913	5.36923e-11	23.6478	4.98571e-11	23.7219	Driver	10.6834	0.086633	0.303	0	25.3	known	TRUE	tumor_driver	TRUE	G12D
39	All	6	32180314	C>A	NOTCH4	Nonsense_Mutation	c.2617N>T	p.Gly873Ter	Clonal	TRUE	FALSE	FALSE	FALSE	FALSE	FALSE	FALSE	PrematureStop	HIGH	0	0													40	predicted	TRUE	other_tumor_driver	TRUE	G873*
39	PT2 and PT9	3	178936082	G>A	PIK3CA	Missense_Mutation	c.1624N>A	p.Glu542Lys	Subclonal	TRUE	TRUE	TRUE	TRUE	TRUE	FALSE	TRUE	Substitution	MODERATE	462	0.0181063	-4.35	0.816	0.091	5.36923e-11	23.6478	0.822048	0.195957	Driver	15.1993	0.051935	0.912	0.04	27.3	known	TRUE	tumor_driver	TRUE	E542K
39	All	17	7577121	G>A	TP53	Missense_Mutation	c.817N>T	p.Arg273Cys	Clonal	TRUE	TRUE	TRUE	TRUE	TRUE	FALSE	TRUE	Substitution	MODERATE	29	0.00113654	-9.73	0.826	0.869	5.36923e-11	23.6478	4.98571e-11	23.7219	Driver	30.7443	0.006895	0.999	0	32	known	TRUE	tumor_driver	TRUE	R273C
40	PT2, PT3, PT4, PT5, PT6, PT7	14	105239420	C>G	AKT1	Missense_Mutation	c.967N>C	p.Asp323His	Subclonal	TRUE	TRUE	TRUE	FALSE	TRUE	FALSE	TRUE	Substitution	MODERATE	0	0	0.93	0.614	0.065	0.0005933	7.42981	0.822048	0.195957	Driver	2.2573	0.1865	0.626	0.02	24.5	known	TRUE	other_tumor_driver	TRUE	D323H
40	All	20	57484420	C>T	GNAS	Missense_Mutation	c.601N>T	p.Arg201Cys	Clonal	TRUE	TRUE	TRUE	TRUE	FALSE	FALSE	TRUE	Substitution	MODERATE	133	0.00521242	-4.43	0.635	0.839	0.000302617	8.10304	4.98571e-11	23.7219	Driver	0.38374	0.47286	1	0.01	35	known	TRUE	tumor_driver	TRUE	R844C
40	PT2, PT3, PT4, PT5, PT6, PT7	12	25398284	C>A	KRAS	Missense_Mutation	c.35N>T	p.Gly12Val	Subclonal	TRUE	TRUE	TRUE	TRUE	TRUE	FALSE	TRUE	Substitution	MODERATE	1319	0.0516931	-2.32	0.936	0.913	5.36923e-11	23.6478	4.98571e-11	23.7219	Driver	10.757	0.085632	0.972	0	29.9	known	TRUE	tumor_driver	TRUE	G12V
40	All	17	56448390	->G	RNF43	Frame_Shift_Ins	c.256_257insC	p.His86ProfsTer10	Clonal	TRUE	TRUE	TRUE	FALSE	FALSE	FALSE	FALSE	FrameShift	HIGH	2	7.83822e-05													34	predicted	TRUE	tumor_driver	TRUE
40	PT5	2	230653657	C>T	TRIP12	Splice_Site	c.4471-1N>A		Subclonal	TRUE	FALSE	FALSE	FALSE	FALSE	FALSE	FALSE	SpliceAcceptor	HIGH	0	0													27	predicted	TRUE	other_tumor_driver	TRUE
41	All	12	25398285	C>G	KRAS	Missense_Mutation	c.34N>C	p.Gly12Arg	Clonal	TRUE	TRUE	TRUE	TRUE	TRUE	FALSE	TRUE	Substitution	MODERATE	0	0	-2.29	0.934	0.911	5.36923e-11	23.6478	4.98571e-11	23.7219	Driver	10.6818	0.086744	0.497	0.03	25	known	TRUE	tumor_driver	TRUE	G12R
41	PT4	15	42003475	G>A	MGA	Nonsense_Mutation	c.3012N>A	p.Trp1004Ter	Subclonal	TRUE	TRUE	FALSE	FALSE	FALSE	FALSE	FALSE	PrematureStop	HIGH	0	0													38	predicted	TRUE	other_tumor_driver	TRUE	W1004*
41	PT10, PT11	9	139405603	C>T	NOTCH1	Splice_Site	c.2587+1N>A		Subclonal	TRUE	TRUE	TRUE	FALSE	FALSE	FALSE	FALSE	SpliceDonor	HIGH	0	0													27	predicted	TRUE	other_tumor_driver	TRUE
41	All	13	48951052	A>G	RB1	Splice_Site		p.X406_splice	Clonal	TRUE	TRUE	TRUE	FALSE	FALSE	FALSE	FALSE	SpliceAcceptor	HIGH	4	0.000156764													24.1	predicted	TRUE	other_tumor_driver	TRUE
41	All	17	7578551	A>T	TP53	Missense_Mutation	c.379N>A	p.Ser127Thr	Clonal	TRUE	TRUE	TRUE	FALSE	FALSE	FALSE	FALSE	Substitution	MODERATE	0	0	-10.7	0.719	0.674	3.30904e-05	10.3163	4.98571e-11	23.7219	Driver	30.6175	0.033363	1	0	28.8	predicted	TRUE	tumor_driver	TRUE	S127T
42	All	9	21974777	GCCA>-	CDKN2A	Frame_Shift_Del	c.47_50delNNNN	p.Leu16ProfsTer9	Clonal	TRUE	TRUE	TRUE	FALSE	FALSE	FALSE	TRUE	FrameShift		3	0.000117573													24.5	known	TRUE	tumor_driver	TRUE
42	PT2, PT3	19	36210763	->C	KMT2B	Frame_Shift_Ins	c.514_515insC	p.Thr176AspfsTer8	Subclonal	TRUE	TRUE	FALSE	FALSE	FALSE	FALSE	FALSE	FrameShift	HIGH	0	0													26.1	other	FALSE		TRUE
42	All	12	25398285	C>G	KRAS	Missense_Mutation	c.34N>C	p.Gly12Arg	Clonal	TRUE	TRUE	TRUE	TRUE	TRUE	FALSE	TRUE	Substitution	MODERATE	0	0	-2.29	0.934	0.911	5.36923e-11	23.6478	4.98571e-11	23.7219	Driver	10.6818	0.086744	0.497	0.03	25	known	TRUE	tumor_driver	TRUE	G12R
42	All	17	7578212	G>A	TP53	Nonsense_Mutation	c.637N>T	p.Arg213Ter	Clonal	TRUE	TRUE	TRUE	TRUE	FALSE	FALSE	TRUE	PrematureStop	HIGH	0	0													37	known	TRUE	tumor_driver	TRUE	R213*
43	All	9	21971186	G>A	CDKN2A	Nonsense_Mutation	c.172N>T	p.Arg58Ter	Clonal	TRUE	TRUE	TRUE	TRUE	FALSE	FALSE	TRUE	PrematureStop	HIGH	0	0		0.384	0.425	0.0740205	2.60341	0.0860867	2.4524						35	known	TRUE	tumor_driver	TRUE	R58*
43	All	12	25398284	C>T	KRAS	Missense_Mutation	c.35N>A	p.Gly12Asp	Clonal	TRUE	TRUE	TRUE	TRUE	TRUE	FALSE	TRUE	Substitution	MODERATE	1079	0.0422872	-2.32	0.936	0.913	5.36923e-11	23.6478	4.98571e-11	23.7219	Driver	10.6834	0.086633	0.303	0	25.3	known	TRUE	tumor_driver	TRUE	G12D
43	All	17	7577538	C>T	TP53	Missense_Mutation	c.743N>A	p.Arg248Gln	Clonal	TRUE	TRUE	TRUE	TRUE	TRUE	FALSE	TRUE	Substitution	MODERATE	109	0.00427183	-9.67	0.853	0.898	5.36923e-11	23.6478	4.98571e-11	23.7219	Driver	30.6478	0.02758	0.994	0	34	known	TRUE	tumor_driver	TRUE	R248Q
44	PT2, PT3, PT4, PT5	12	49425743	G>-	KMT2D	Frame_Shift_Del	c.12745delN	p.Gln4249ArgfsTer29	Subclonal	TRUE	TRUE	TRUE	FALSE	FALSE	FALSE	FALSE	FrameShift		0	0													35	predicted	TRUE	other_tumor_driver	TRUE
44	PT2, PT3, PT4, PT5	12	25398284	C>T	KRAS	Missense_Mutation	c.35N>A	p.Gly12Asp	Subclonal	TRUE	TRUE	TRUE	TRUE	TRUE	FALSE	TRUE	Substitution	MODERATE	1079	0.0422872	-2.32	0.936	0.913	5.36923e-11	23.6478	4.98571e-11	23.7219	Driver	10.6834	0.086633	0.303	0	25.3	known	TRUE	tumor_driver	TRUE	G12D
44	PT1	12	25398285	C>G	KRAS	Missense_Mutation	c.34N>C	p.Gly12Arg	Subclonal	TRUE	TRUE	TRUE	TRUE	TRUE	FALSE	TRUE	Substitution	MODERATE	0	0	-2.29	0.934	0.911	5.36923e-11	23.6478	4.98571e-11	23.7219	Driver	10.6818	0.086744	0.497	0.03	25	known	TRUE	tumor_driver	TRUE	G12R
44	PT2	17	29553477	->C	NF1	Frame_Shift_Ins		I679Dfs*21	Subclonal	TRUE	TRUE	TRUE	FALSE	FALSE	FALSE	TRUE	FrameShift	HIGH	18	0.00070544													34	known	TRUE	other_tumor_driver	TRUE
44	PT2, PT3, PT4, PT5	17	7578530	A>C	TP53	Missense_Mutation	c.400N>G	p.Phe134Val	Subclonal	TRUE	TRUE	TRUE	FALSE	FALSE	FALSE	FALSE	Substitution	MODERATE	46	0.00180279	-9.47	0.685	0.619	0.000100127	9.20907	4.98571e-11	23.7219	Driver	30.7196	0.010231	0.999	0	29.1	predicted	TRUE	tumor_driver	TRUE	F134V
45	PT3	11	108114679	G>A	ATM	Splice_Site	c.497-1N>A		Subclonal	TRUE	TRUE	TRUE	FALSE	FALSE	FALSE	FALSE	SpliceAcceptor	HIGH	0	0													24.4	predicted	TRUE	tumor_driver	TRUE
45	PT3, PT4, PT7, PT8	7	151845531	A>-	KMT2C	Frame_Shift_Del	c.13481delN	p.Met4494SerfsTer23	Subclonal	TRUE	TRUE	TRUE	FALSE	FALSE	FALSE	FALSE	FrameShift		0	0													36	predicted	TRUE	tumor_driver	TRUE
45	All	12	25398284	C>A	KRAS	Missense_Mutation	c.35N>T	p.Gly12Val	Clonal	TRUE	TRUE	TRUE	TRUE	TRUE	FALSE	TRUE	Substitution	MODERATE	1319	0.0516931	-2.32	0.936	0.913	5.36923e-11	23.6478	4.98571e-11	23.7219	Driver	10.757	0.085632	0.972	0	29.9	known	TRUE	tumor_driver	TRUE	G12V
45	All	18	48584560	C>T	SMAD4	Nonsense_Mutation	c.733N>T	p.Gln245Ter	Clonal	TRUE	TRUE	TRUE	FALSE	FALSE	FALSE	FALSE	PrematureStop	HIGH	3	0.000117573													37	predicted	TRUE	tumor_driver	TRUE	Q245*
45	All	17	7577538	C>T	TP53	Missense_Mutation	c.743N>A	p.Arg248Gln	Clonal	TRUE	TRUE	TRUE	TRUE	TRUE	FALSE	TRUE	Substitution	MODERATE	109	0.00427183	-9.67	0.853	0.898	5.36923e-11	23.6478	4.98571e-11	23.7219	Driver	30.6478	0.02758	0.994	0	34	known	TRUE	tumor_driver	TRUE	R248Q
46	PT4, PT6, PT7, PT8, PT9	14	21870242	A>T	CHD8	Nonsense_Mutation	c.3936N>A	p.Tyr1312Ter	Subclonal	TRUE	TRUE	FALSE	FALSE	FALSE	FALSE	FALSE	PrematureStop	HIGH	0	0													39	predicted	TRUE	other_tumor_driver	TRUE	Y1312*
46	All	12	25398285	C>G	KRAS	Missense_Mutation	c.34N>C	p.Gly12Arg	Clonal	TRUE	TRUE	TRUE	TRUE	TRUE	FALSE	TRUE	Substitution	MODERATE	0	0	-2.29	0.934	0.911	5.36923e-11	23.6478	4.98571e-11	23.7219	Driver	10.6818	0.086744	0.497	0.03	25	known	TRUE	tumor_driver	TRUE	G12R
46	PT1	9	127920568	G>A	PPP6C	Nonsense_Mutation	c.331N>T	p.Arg111Ter	Subclonal	TRUE	TRUE	TRUE	FALSE	FALSE	FALSE	FALSE	PrematureStop	HIGH	0	0													36	predicted	TRUE	other_tumor_driver	TRUE	R148*
46	All	17	7578190	T>C	TP53	Missense_Mutation	c.659N>G	p.Tyr220Cys	Clonal	TRUE	TRUE	TRUE	TRUE	TRUE	FALSE	TRUE	Substitution	MODERATE	30	0.00117573	-9.47	0.772	0.751	5.36923e-11	23.6478	4.98571e-11	23.7219	Driver	30.6731	0.020574	0.998	0	28.9	known	TRUE	tumor_driver	TRUE	Y220C
46	PT2, PT3, PT5	2	230653657	C>T	TRIP12	Splice_Site	c.4471-1N>A		Subclonal	TRUE	FALSE	FALSE	FALSE	FALSE	FALSE	FALSE	SpliceAcceptor	HIGH	0	0													27	predicted	TRUE	other_tumor_driver	TRUE

## Sheet: Table S7
Table S7: Copy Number Alterations in Recurrent Pancreatic Cancer a
Gene	PAM37PT1b	PAM37PT3	PAM37PT4	PAM37PT5	PAM37PT6	PAM38PT1	PAM38PT2	PAM38PT3	PAM38PT4	PAM39PT1	PAM39PT2	PAM39PT3	PAM39PT4	PAM39PT5	PAM39PT6	PAM39PT7	PAM39PT8	PAM39PT9	PAM40PT1	PAM40PT2	PAM40PT3	PAM40PT4	PAM40PT5	PAM40PT6	PAM40PT7	PAM40PT8	PAM41PT1	PAM41PT10	PAM41PT11	PAM41PT2	PAM41PT3	PAM41PT4	PAM41PT5	PAM41PT6	PAM41PT7	PAM41PT8	PAM41PT9	PAM42PT1	PAM42PT2	PAM42PT3	PAM42PT4	PAM42PT5	PAM42PT6	PAM43PT1	PAM43PT2	PAM43PT3	PAM43PT4	PAM43PT5	PAM43PT6
CDKN2A												loss(1)		del(0)	del(0)	del(0)		del(0)			loss(1)	del(0)		loss(1)	del(0)	loss(1)												mut	mut/loss(1)	mut/loss(1)	mut/loss(1)	mut/loss(1)	mut	mut	mut	mut/del(0)	mut/loss(1)	mut	mut
HIST1H3B	amp(11)	amp(16)	gain(4)	amp(38)	amp(29)		gain(4)				gain(4)		gain(4)	gain(6)		gain(4)	gain(5)	gain(6)			gain(4)		gain(4)							gain(4)	gain(4)												gain(4)	gain(4)	gain(6)	gain(4)		amp(10)	gain(8)
MYC	amp(13)	gain(6)	amp(11)	amp(16)	amp(10)						gain(5)			gain(6)	gain(5)	gain(6)		gain(8)	gain(4)									gain(6)	gain(6)	amp(9)	gain(7)	gain(8)	gain(5)	gain(5)	gain(8)	gain(7)	gain(6)							gain(4)	gain(6)	gain(5)	gain(5)	gain(4)
MYCL				gain(6)			gain(4)				gain(4)		gain(4)				gain(4)	gain(4)					gain(4)				amp(10)	amp(20)	amp(16)	amp(23)	gain(4)	amp(23)	amp(13)	amp(15)	amp(15)	amp(13)	amp(16)
PRKCI	gain(4)		gain(4)	gain(5)	gain(6)						gain(4)		gain(4)				gain(6)	gain(5)																					amp(38)	amp(32)			gain(4)					gain(4)
STK11	del(0)	del(0)		del(0)	del(0)	del(0)	del(0)	del(0)	del(0)	del(0)			del(0)		del(0)		loss(1)		del(0)	del(0)	del(0)	loss(1)	del(0)		del(0)	del(0)												del(0)	del(0)	loss(1)	loss(1)	loss(1)	del(0)					del(0)
TP53	del(0)	del(0)		del(0)	del(0)								loss(1)										del(0)				del(0)											del(0)	loss(1)	loss(1)	loss(1)	loss(1)		loss(1)	del(0)	loss(1)	loss(1)	loss(1)	loss(1)
TRAF3		del(0)								del(0)			del(0)							del(0)			del(0)
Abbreviations used are:Gain, increased copy number (up to 8 copies); Amp, total copy number greater than 8; del, homozygous deletion; loss, allelic loss. Numbers in parentheses indicate the total copy number.
bSample names in purple indicate those for which whole genome duplication was identified by FACETs.
[truncated: 22 more columns]

## Sheet: Table S8
Table S8: KRAS Genotypes in Primary and Recurrent Pancreatic Cancer
Patient	Samplea	Hugo_Symbol	tcn	lcn	chr	seg.start	seg.end	frac_elev_major_cn	Nprobes	WGD	mcn	FACETS_CNA	FACETS_CALL
PAM37	PT5	KRAS	8	3	12	6172212	32945495	0.920322	5	WGD	5	2	AMP
PAM37	PT6	KRAS	6	2	12	3751046	40645257	0.607435	5	WGD	4	2	AMP
PAM37	PT4	KRAS	3	0	12	16369907	31605400	0.737711	5	WGD	3	-1	CNLOH BEFORE & LOSS
PAM37	PT3	KRAS	2	1	12	6167196	40844500	0.234045	5	no WGD	1	0	DIPLOID
PAM37	PT1	KRAS	5	1	12	7175762	99042589	0.868812	5	WGD	4	1	LOSS & GAIN
PAM38	PT1	KRAS	2	1	12	208500	133811000	0.0907676	5	no WGD	1	0	DIPLOID
PAM38	PT3	KRAS	2	1	12	395300	32908780	0.0363185	5	no WGD	1	0	DIPLOID
PAM38	PT2	KRAS	1	0	12	10583708	48187329	0.0213839	5	no WGD	1	-1	HETLOSS
PAM38	PT4	KRAS	1	0	12	208450	34179157	0.00672067	5	no WGD	1	-1	HETLOSS
PAM39	PT1	KRAS	2	1	12	416180	124364214	0.0240982	5	no WGD	1	0	DIPLOID
PAM39	PT3	KRAS	2	1	12	208409	133811050	0.0488926	5	no WGD	1	0	DIPLOID
PAM39	PT6	KRAS	3	1	12	208300	53085826	0.213863	5	no WGD	2	1	GAIN
PAM39	PT4	KRAS	4	2	12	314000	53433948	0.00855791	5	no WGD	2	1	TETRAPLOID
PAM39	PT5	KRAS	4	1	12	208351	124387750	0.937216	5	WGD	3	-1	CNLOH AFTER
PAM39	PT9	KRAS	4	1	12	208500	133811050	0.943245	5	WGD	3	-1	CNLOH AFTER
PAM39	PT7	KRAS	3	0	12	347068	53292561	0.926185	5	WGD	3	-1	CNLOH BEFORE & LOSS
PAM39	PT8	KRAS	5	1	12	6172348	109328000	0.91773	5	WGD	4	1	LOSS & GAIN
PAM39	PT2	KRAS	3	1	12	7288734	48191800	0.899746	5	WGD	2	-1	LOSS AFTER
PAM40	PT1	KRAS	4	2	12	330175	53166650	0.0280635	5	no WGD	2	1	TETRAPLOID
PAM40	PT2	KRAS	2	1	12	5842100	48249600	0.174214	5	no WGD	1	0	DIPLOID
PAM40	PT3	KRAS	6	3	12	5841700	48358057	0.979011	5	WGD	3	2	AMP
PAM40	PT4	KRAS	2	1	12	5916550	132905850	0.173707	5	no WGD	1	0	DIPLOID
PAM40	PT5	KRAS	1	0	12	5724427	52709300	0.142363	5	no WGD	1	-1	HETLOSS
PAM40	PT6	KRAS	2	1	12	5744615	132502811	0.162494	5	no WGD	1	0	DIPLOID
PAM40	PT7	KRAS	2	1	12	5021984	48240078	0.163329	5	no WGD	1	0	DIPLOID
PAM40	PT8	KRAS	2	1	12	5744615	132688115	0.179222	5	no WGD	1	0	DIPLOID
PAM41	PT6	KRAS	4	1	12	18435035	34179800	0.693028	5	WGD	3	-1	CNLOH AFTER
PAM41	PT9	KRAS	4	0	12	22401911	28458800	0.768035	5	WGD	4	-1	CNLOH BEFORE
PAM41	PT10	KRAS	3	0	12	21679300	29608238	0.845042	5	WGD	3	-1	CNLOH BEFORE & LOSS
PAM41	PT5	KRAS	3	0	12	18243150	27571200	0.841603	5	WGD	3	-1	CNLOH BEFORE & LOSS
PAM41	PT1	KRAS	2	1	12	7289586	32907997	0.229111	5	no WGD	1	0	DIPLOID
PAM41	PT3	KRAS	2	1	12	8813545	39299326	0.901462	5	WGD	1	-1	DOUBLE LOSS AFTER
PAM41	PT4	KRAS	3	1	12	15834204	94562945	0.836586	5	WGD	2	-1	LOSS AFTER
PAM41	PT8	KRAS	3	1	12	6860030	108145200	0.844118	5	WGD	2	-1	LOSS AFTER
PAM41	PT2	KRAS	3	1	12	7293796	125558500	0.799132	5	WGD	2	-1	LOSS AFTER
PAM41	PT11	KRAS	2	0	12	20704650	32133925	0.734633	5	WGD	2	-1	LOSS BEFORE
PAM41	PT7	KRAS	2	0	12	6859891	47761298	0.817635	5	WGD	2	-1	LOSS BEFORE
PAM42	PT3	KRAS	2	1	12	208450	48359984	0.0413186	5	no WGD	1	0	DIPLOID
PAM42	PT1	KRAS	4	2	12	521226	108958229	0.00183023	5	no WGD	2	1	TETRAPLOID
PAM42	PT4	KRAS	1	0	12	537996	48173000	0.196013	5	no WGD	1	-1	HETLOSS
PAM42	PT6	KRAS	4	2	12	208500	133810949	0.0147315	5	no WGD	2	1	TETRAPLOID
PAM42	PT2	KRAS	4	2	12	208450	33592344	0.830707	5	WGD	2	0	TETRAPLOID
PAM42	PT5	KRAS	4	2	12	208351	27081664	0.907543	5	WGD	2	0	TETRAPLOID
PAM43	PT2	KRAS	6	3	12	208450	33592362	0.800925	5	WGD	3	2	AMP
PAM43	PT3	KRAS	6	1	12	21788350	34317900	0.698933	5	WGD	5	2	AMP
PAM43	PT4	KRAS	6	1	12	21790075	34317950	0.70388	5	WGD	5	2	AMP
PAM43	PT5	KRAS	8	4	12	21918800	34317900	0.865175	5	WGD	4	2	AMP
PAM43	PT6	KRAS	6	2	12	21790200	33579034	0.78987	5	WGD	4	2	AMP
PAM43	PT1	KRAS	4	2	12	7069429	34179675	0.627209	5	WGD	2	0	TETRAPLOID
PAM44	PT1	KRAS	2	1	12	208300	33021917	0.0530517	5	no WGD	1	0	DIPLOID
PAM44	PT2	KRAS	3	1	12	23686050	33205314	0.0920245	5	no WGD	2	1	GAIN
PAM44	PT3	KRAS	3	1	12	22837830	32994073	0.102289	5	no WGD	2	1	GAIN
PAM44	PT4	KRAS	3	1	12	22837885	33592362	0.0871131	5	no WGD	2	1	GAIN
PAM44	PT5	KRAS	3	1	12	23686050	32994193	0.0822854	5	no WGD	2	1	GAIN
PAM45	PT1	KRAS	4	2	12	24970966	33535289	0.248854	5	no WGD	2	1	TETRAPLOID
PAM45	PT2	KRAS	1	0	12	7249800	48867000	0.033543	5	no WGD	1	-1	HETLOSS
PAM45	PT3	KRAS	3	0	12	7280924	48105543	0.913461	5	WGD	3	-1	CNLOH BEFORE & LOSS
PAM45	PT4	KRAS	3	0	12	7245000	48188702	0.978325	5	WGD	3	-1	CNLOH BEFORE & LOSS
PAM45	PT5	KRAS	2	1	12	9027429	48954450	0.0834322	5	no WGD	1	0	DIPLOID
PAM45	PT6	KRAS	1	0	12	9070302	48867039	0.0541462	5	no WGD	1	-1	HETLOSS
PAM45	PT7	KRAS	1	0	12	208300	48378294	0.0353457	5	no WGD	1	-1	HETLOSS
PAM45	PT8	KRAS	1	0	12	7249314	48378591	0.00669701	5	no WGD	1	-1	HETLOSS
PAM46	PT4	KRAS	3	1	12	7242900	48090103	0.905912	5	WGD	2	-1	LOSS AFTER
PAM46	PT6	KRAS	3	1	12	22208070	48063800	0.843008	5	WGD	2	-1	LOSS AFTER
PAM46	PT8	KRAS	3	1	12	208450	48081637	0.941994	5	WGD	2	-1	LOSS AFTER
PAM46	PT9	KRAS	3	1	12	208300	48388223	0.932685	5	WGD	2	-1	LOSS AFTER
PAM46	PT2	KRAS	4	2	12	208450	48062950	0.917411	5	WGD	2	0	TETRAPLOID
PAM46	PT3	KRAS	4	2	12	7277450	45567192	0.901034	5	WGD	2	0	TETRAPLOID
PAM46	PT5	KRAS	4	2	12	21526282	46582820	0.893864	5	WGD	2	0	TETRAPLOID
PAM46	PT7	KRAS	4	2	12	7241341	49217211	0.929624	5	WGD	2	0	TETRAPLOID
a Sample PAM46PT1 was excluded due to low cellularity.
